# Supplementary material
Source: Elsevier journal article supplement (https://www.sciencedirect.com/science/article/pii/S1695403321001909)
Supplement: mmc1 [file S1695403321001909:mmc1.docx]

## **ANEXO 1. PREGUNTAS DE INVESTIGACIÓN**

| **PREGUNTA** | **PUNTUACION (1-9)** |
| --- | --- |
| **POBLACION** | |
| ¿En qué pacientes está indicada la RIR? | > 7→ CLAVE |
| ¿En qué pacientes está contraindicada la RIR? | > 7→ CLAVE |
| **INTERVENCION** | |
| ¿A qué ritmo de infusión se debe administrar la RIR? | > 7→ CLAVE |
| ¿Durante cuánto tiempo se debe mantener la RIR? | > 7→ CLAVE |
| ¿Qué tipo de suero se debe utilizar para realizar la RIR? | > 7→ CLAVE |
| ¿Es necesario añadir glucosa al suero para realizar la RIR? | > 7→ CLAVE |
| **CONTROLES** | |
| ¿Es necesario realizar algún control analítico antes de iniciar la RIR? | > 7→ CLAVE |
| ¿Qué controles clínicos se deben realizar durante la RIR? | > 7→ CLAVE |
| ¿Se debe realizar algún control analítico tras finalizar la RIR? | 4-6--> RELEVANTE |
| **RESULTADOS** | |
| ¿Es segura la RIR? | > 7→ CLAVE |

RIR: Rehidratación intravenosa rápida
