# Supplementary material
Source: Elsevier journal article supplement (https://www.sciencedirect.com/science/article/pii/S1695403321001909)
Supplement: mmc3 [file S1695403321001909:mmc3.docx]

## **Anexo 3. PALABRAS CLAVE.**

| **PALABRA CLAVE** | **TERMINO MeSH** |
| --- | --- |
| Deshidratación | Dehydration |
| Rehidratación rápida intravenosa | Rapid intravenous rehydration |
| Terapia de fluidos | Fluid therapy |
| Solución rehidratación | Rehydration solution |
| Infusión intravenosa | Infusions parenteral/ infusions intravenous |
| Suero isotónico | Isotonic solutions  Crystalloid solutions |
| Solución Ringer | Ringer´s solution |
| Glucosa | Glucose |
| Cetosis | Ketosis |
| Acidosis | Acidosis |
| Edema | Edema |
| Edema pulmonar | Pulmonary edema |
| Edema cerebral | Brain edema |
| Insuficiencia cardiaca | Heart failure |
| Hiperhidratación | Hyperhydration |
| Hipercloremia | Hyperchloremia |
| Hipernatremia | Hypernatremia |
| Hiponatremia | Hyponatremia |
| Potasio | Potassium |
| Estado de hidratación del organismo | Organism fluid status  Organism hydration status |
| Balance electrolítico de agua | Water-electrolyte balance |
