# Supplementary material
Source: Elsevier journal article supplement (https://www.sciencedirect.com/science/article/pii/S1695403321001909)
Supplement: mmc4 [file S1695403321001909:mmc4.docx]

**ANEXO 4. RESUMEN ESTUDIOS REVISADOS**

| ESTUDIO, AÑO | TIPO DE ESTUDIO | ÁMBITO DE ESTUDIO | POBLACIÓN (CRITERIOS INCLUSIÓN) | POBLACIÓN (CRITERIOS EXCLUSIÓN) | TAMAÑO MUESTRA | OBJETIVO |
| --- | --- | --- | --- | --- | --- | --- |
| Gorelick, 2002 | RS (10 estudios: 3 ECAs y 7 series de casos) | 5 UP, 5 HOS  3 USA, 1 Brasil, 1 Costa Rica, 1 Finlandia, 1 Bangladesh, 1 Canadá, 1 Indonesia, 1 Argentina | Artículos desde 1960-2002 sobre RIR en niños con DH secundaria a GEA | Adultos  Animales  RHO  Patología de base | 382 | Revisar la literatura disponible sobre RIR en niños con DH debido a GEA |
| Steiner, 2004 | RS (13 estudios) | 5 UP, 8 HOS  5 USA, 2 Egipto, 1 Australia, 1 Kenya, 1 Colombia, 1 Indonesia, 1 Turquía | Pacientes de 1 mes a 5 años con DH |  | 1246 | Analizar el valor de distintos síntomas, signos y parámetros de laboratorio en la evaluación del grado de DH en niños |
| Toaimah, 2016 | RS (3 ECA: *Nager 2010, Freedman 2011, Azarfar 2014)* | 3 UP  1 USA,  1 Canadá,  1 Irán | Pacientes de 0-18 años con DH leve-moderada secundaria a GEA | DH grave  Estudios descriptivos  Trabajos que incluyan RHO  Adultos  DH no debida a GEA | 464 | Analizar la eficacia de la RIV ultrarrápida comparada con la RIR (considerada pauta estándar) en niños con DH leve-moderada secundaria a GEA |
| Iro,  2018 | RS (3 ECA: *Nager 2010, Freedman 2011, Azarfar 2014)* | 3 UP  1 USA  1 Canadá  1 Irán | Pacientes de 0-18 años con DH moderada o grave secundaria a GEA | Malnutrición severa  Diarrea crónica o persistente (>14 días) | 464 | Seguridad (mortalidad y EA) y eficacia de la RIR para el tratamiento de la DH moderada-grave en niños con GEA |
| Grigsby, 2019 | Metaanálisis (2 ECA: *Levy 2013, Sendarrubias 2017*) | 2 UP  1 USA,  1 España | Población pediátrica  Estudios aleatorizados que comparan la RIR con/sin glucosa en niños con DH secundaria a GEA | Pacientes hospitalizados  Inestabilidad hemodinámica  Hipoglucemia  Trastornos metabólicos | 333 | Analizar la eficacia y la seguridad de la administración de glucosa en las soluciones de RIR Primario: Proporción ingresos en visita inicial  Secundarios: tiempo de estancia en UP, reconsulta o ingreso en la semana siguiente a la visita índice, cambio de puntuación en escala de DH o en los síntomas clínicos y EA |
| Alam,  2009 | ECA (aleatorización en la fase de tratamiento oral, no la RIV) | Bangladesh | Pacientes de 3-36 meses gravemente malnutridos con DH severa secundaria a GEA por cólera, <48 h de evolución | Sangre en heces  Niños con infecciones graves (meningitis, sepsis, neumonía grave) | 175 | Primario: Seguridad de pauta RIR (100 ml/kg en 3-6 h), monitorizando la incidencia de insuficiencia cardiaca por sobrecarga de volumen y de alteraciones electrolíticas (glucosa, sodio, potasio)  Secundario: Comparar la eficacia de 3 fórmulas de RHO en reducir deposiciones y duración de la GEA |
| Nager,  2010 | ECA | UP  USA | Pacientes de 3-36 meses con DH moderada secundaria a GEA o vómitos, en los que fracasó la tolerancia oral | DH severa  Shock  Sospecha patología quirúrgica, del SNC, enfermedad crónica  Alteraciones electrolíticas graves | 88 | Eficacia de la rehidratación “ultrarrápida” (SS 0.9% 50 ml/kg/h) *vs* “RIR estándar” (SS 0.9% 50 ml/kg en 3 h) en DH moderada secundaria a GEA |
| Freedman, 2011 | ECA | UP  Canadá | Pacientes >90 días con DH secundaria a GEA, en los que fracasa la tolerancia oral y se prescribe RIV | Peso <5 kg o >33 kg  Pacientes con restricción de fluidos  Sospecha de patología quirúrgica  Historia de enfermedad sistémica grave o cirugía abdominal  Vómitos biliosos o hemáticos  Hipotensión  Hipoglucemia /hiperglucemia  Barrera idiomática | 226 | Comparan pauta ultrarrápida (SS0.9% 60 ml/kg durante 1 h) *vs* pauta “estándar” (SS0.9% 20 ml/kg durante 1 h)  Objetivo principal:  Eficacia de la RIR (corrección clínica de la DH a las 2 h)  Secundario: Necesidad de tratamiento prolongado, estado de hidratación (escalas) a las 4 h, tiempo de estancia en urgencias, reconsultas en <72 h, tolerancia oral y actitud del médico responsable respecto al alta |
| Mahajan, 2012 | ECA | UP  INDIA | Pacientes de 1 mes - 18 años  DH severa secundaria a diarrea | Diarrea >14 días  Malnutrición severa  Malformaciones graves  Enfermedad sistémica  Hipoglucemia (<40 mg/dl) | 22 | Comparación entre pautas de RIR (100 ml/kg en 3-6 h) con SS0.9% *vs* RL.  Objetivo principal: cambios en el pH  Secundario: tiempo hasta la corrección de signos de DH severa |
| Levy,  2013 | ECA | UP  USA | Pacientes de 6 meses a 6 años con GEA y DH que requieren RIR | Enfermedad crónica  Alteración del metabolismo de la glucosa  Síntomas de >7 días  Fluidoterapia IV en las 12 h previas  Sospecha de comorbilidad (neumonía, ITU o apendicitis)  Pacientes con glucemia <40 o >200 mg/dl | 188 | Comparan SS0.9%  *vs* SGS5% (20 ml/kg durante 1 h)  Objetivo principal: Comparar proporción de ingresos  Secundario: Comparar cambios en la cetonemia en cada paciente  Otros: Reconsultas, cambio en el estado general (3h), tolerancia oral, tiempo de estancia, volumen de líquidos orales |
| Levy,  2013 | ECA (subestudio del anterior) | UP  USA | Pacientes de 6 meses a 6 años con GEA y DH que requieren RIR | Enfermedad crónica  Alteración del metabolismo de la glucosa  Síntomas de >7 días  Fluidoterapia IV en las 12 h previas  Sospecha de comorbilidad (neumonía, ITU o apendicitis)  Pacientes con glucemia <40 o >200 mg/dl | 188 | Determinar la relación entre los valores de cetonemia basales y dos parámetros: grado de DH y magnitud de la acidosis metabólica en pacientes con DH secundaria a GEA |
| Freedman, 2013 | ECA (análisis secundario del estudio de 2011) | UP  Canadá | Pacientes >90 días con DH secundaria a GEA, en la que fracasa la tolerancia oral y se prescribe RIV | Peso <5 kg o >33 kg  Pacientes con restricción de fluidos  Sospecha de patología quirúrgica  Historia de enfermedad sistémica grave o cirugía abdominal  Vómitos biliosos o hemáticos  Hipotensión  Hipo/hiperglucemia  Barrera idiomática | 226 | Analizar el riesgo de disnatremias en pacientes que reciben durante 1 h SS0.9% a ritmo de 60 ml/kg (ultrarrápida) *vs* 20 ml/kg (“estándar”); seguido de SGS 5% a ritmo de mantenimiento durante 3 h  Objetivo principal: Hiponatremia a las 4 h del inicio del tratamiento  Secundarios: Cambios en los niveles de sodio, magnitud del descenso del sodio, riesgo de hipernatremia, correlaciones entre parámetros urinarios e hiponatremia y sobrecarga de volumen |
| Freedman, 2014 | ECA (análisis secundario del estudio de 2011) | UP  Canadá | Niños > 90 días con DH secundaria a GEA, en la que fracasó la tolerancia oral | Peso <5 kg o >33 kg  Pacientes con restricción de fluidos  Sospecha de patología quirúrgica  Historia de enfermedad sistémica grave o cirugía abdominal  Vómitos biliosos o hemáticos  Hipotensión  Hipo/hiperglucemia  Barrera idiomática | 174 | Analizar si el valor del bicarbonato al inicio de la RIR predice las reconsultas en los 7 días posteriores a la visita inicial |
| Azarfar, 2014 | ECA | UP  Irán | Niños con DH moderada secundaria a GEA o vómitos en lo que fracasa la tolerancia oral | DH grave  Shock e hipotensión  Alteraciones electrolíticas  DH leve o no DH | 150 | Analizar la resolución de los vómitos comparando una pauta de RIR (reciben 20-30 ml/kg en 2 h de solución isotónica) *vs* RIV estándar en 24 h (reciben 30-35 ml/kg en 4 h de suero de composición no especificada) |
| Allen,  2016 | ECA | UP  Multicéntrico  USA y Canadá | Pacientes de 6 meses a 12 años  DH moderada-severa secundaria a GEA y HCO3 <22 mEq/L | Enfermedad de base que afecte al manejo hidroelectrolítico  Tratamiento en las 24-72 h previas con antiácidos, antidiarreicos o corticoides sistémicos | 77 | Comparar PLA *vs* SS0.9% (ritmo 20 ml/kg/h)  Objetivo principal: Cambio en los niveles de HCO3 (basal y a las 4 h)  Secundarios: Corrección de la DH, náuseas-vómitos, dolor abdominal, volumen y duración de la RIR, tiempo de estancia en UP y EA |
| Sendarrubias, 2017 | ECA | UP  Multicéntrico  España | Pacientes de 6 meses a 16 años  DH moderada- grave secundaria a GEA | Peso > 35 kg  Inestabilidad hemodinámica  Enfermedad crónica  Glucemia <50 mg/dl  Na <125 o >155 mmol/L  Síntomas >5 días | 145 | Compara 20 ml/kg/h durante 2 h de SS0.9% *vs* SGS2.5%  Principal: Comparar proporción de ingresos y reconsultas en UP en <72 h  Secundarios: Identificar diferencias en la evolución de la glucemia y la cetonemia entre ambos grupos |
| Kartha,  2017 | ECA | UP  India | Pacientes de 1 mes a 12 años  DH severa secundaria a diarrea | Malnutrición severa  Diarrea >7 días  Sangre en heces  Enfermedad grave de base  Tratamiento en las 24 h previas con RL o SS0.9% | 68 | Comparan RIR según plan-C de la OMS (100 ml/kg en 6 h) con RL *vs* SS0.9%  Objetivo principal: Mejoría estado clínico y pH >7,35 al final de la rehidratación (6 h)  Secundarios: Cambios en electrolitos, gasometría, función renal, volumen requerido para corregir la DH, tiempo en comenzar tolerancia oral, tiempo de estancia hospitalaria, análisis coste-eficacia |
| Houston, 2019 | ECA, abierto en fase II | Hospital  MulticéntricoUganda y  Kenia | Pacientes de 3 meses a 12 años  DH severa secundaria a GEA | Malnutrición severa  Diarrea >14 días  Enfermedad cardíaca  Ausencia de un padre/tutor para consentimiento | 122 | Valorar la seguridad de la rehidratación Plan-C de la OMS (RL 100 ml/kg en 3 h si >1 año o 6 h si <1 año más bolos de SS0.9% si shock) *vs* RL 100 ml/kg en 8 h sin bolos adicionales |
| Alam,  2019 | ECA | Bangladesh | Niños entre 6 y 60 meses con DH severa secundaria a diarrea y malnutrición grave | Disentería, definida por sangre en heces  Neumonía severa  Sospecha de shock séptico o sepsis  Sospecha meningitis  Uso de antibióticos | 208 | Evaluar la efectividad y seguridad de una pauta de RIR (100 ml/kg en 3-6 h) *vs* pauta lenta (15 ml/kg/h durante 2 h y resto del déficit mediante SNG) |
| Martín del Barrio,  2008 | Descriptivo, prospectivo | UP  España | Pacientes de 3 meses a 18 años con GEA a los que se le realiza analítica | Enfermedades metabólicas, cardiopatías, nefropatías  Tratamiento con fármacos que puedan alterar los iones | 163 | Determinar los motivos de solicitud analítica en niños con GEA  Establecer el tipo y la frecuencia de las alteraciones analíticas encontradas y si éstas implican un cambio en el tratamiento y/o se relacionan con el tiempo de estancia hospitalaria  Valorar la capacidad del médico para predecir alteraciones analíticas |
| Parkin,  2010 | Descriptivo prospectivo | UP  Canadá | Pacientes de 1-36 meses con diagnóstico de GEA y DH | Causas de DH distintas de la GEA  Enfermedad crónica (gastrointestinal, renal, fibrosis quística)  Malnutrición  Fluidoterapia IV en las 24 h previas  Alteraciones del sodio (<130 mEq/L o >150 mEq/L) | 93 | Evaluar el valor de la puntuación en la *Clinical Dehydration Scale* (CDS) y de dos parámetros de laboratorio (bicarbonato y pH) como predictores del grado de DH |
| Hayajneh, 2010 | Descriptivo prospectivo | Jordania | Niños con diarrea y/o vómitos | Problemas gastrointestinales anatómicos o funcionales  Malnutrición  Inmunodeficiencias | 251 | Buscar asociación entre datos clínicos y de laboratorio en niños con DH grave |
| Okposio, 2015 | Descripitivo prospectivo | Unidad de Tratamiento de Diarrea Hospital de Benin (Nigeria) | Paciente de 29 días a 59 meses con DH secundaria a GEA | Tratamiento previo con diuréticos | 185 | Describir el perfil de las alteraciones hidroelectrolíticas y del equilibrio ácido-base de los niños con DH secundaria a GEA |
| Janet,  2015 | Descriptivo prospectivo | UP  Multicéntrico  España | Pacientes de 6 meses a 16 años  <40 kg  DH leve-moderada isonatrémica en contexto de GEA o vómitos con fracaso de RHO | DH grave  Sodio >150 o <130 mmol/L, potasio >5,5 o <3 mmol/L  Inestabilidad hemodinámica  Diarrea >5 días  Vómitos crónicos secundarios a enfermedad neurológica o metabólica  Enfermedad crónica  Cirugía abdominal  Vómitos biliosos o hemáticos | 91 | Determinar la efectividad y la seguridad de una pauta de RIR (SGS2.5% a 20 ml/kg/h durante 2 h) |

RS: Revisiones sistemáticas. ECA: Ensayos clínicos aleatorizados. UP: Urgencias pediátricas. HOS: Hospitalario. RIR: Rehidratación intravenosa rápida. DH: Deshidratación. GEA: Gastroenteritis. RHO: Rehidratación oral. RIV: Rehidratación intravenosa. EA: Efectos adversos. SNC: Sistema nervioso central. SS0.9%: Suero salino fisiológico. RL: Ringer lactato. ITU: Infección tracto urinario. IV: Intravenoso. SGS5%: Suero glucosalino 5%. HCO3: Bicarbonato. PLA: Plasmalyte-A. Na: Sodio. SGS2.5%: Suero glucosalino 2.5%. SNG: Sonda nasogástrica.

***Plan C de la OMS:***Fase 1: 30 ml/kg en 30 minutos si edad >1 año (o en 1 hora si <1 año). En caso de shock bolos de SS0.9% a 20 ml/kg lo más rápido posible (hasta un máximo de 3 bolos) .Fase 2: 70 ml/kg en 2,5 horas si >1 año (o en 5 horas si <1 año).
