# Supplementary material
Source: Elsevier journal article supplement (https://www.sciencedirect.com/science/article/pii/S1695403321001909)
Supplement: mmc5 [file S1695403321001909:mmc5.docx]

# Anexo 5.

# DOCUMENTO DE POSICIONAMIENTO DE REHIDRATACIÓN INTRAVENOSA RÁPIDA EN GASTROENTERITIS AGUDA

# TEXTO SUPLEMENTARIO.

## PREGUNTA 1: ¿EN QUÉ PACIENTES ESTÁ INDICADA LA RIR?

## PREGUNTA 2: ¿EN QUÉ PACIENTES ESTÁ CONTRAINDICADA LA RIR?

***COMENTARIO DE LA EVIDENCIA***

No se ha identificado ninguna publicación cuyo objetivo principal o secundario fuese establecer las indicaciones y/o contraindicaciones de la RIR.No obstante, en cada uno de los estudios revisados se definen una serie de criterios de inclusión y exclusión para la población de estudio (anexo 4), los cuales se analizan a continuación.

*Nager* y *Azarfar*(1)(2) incluyen solamente pacientes con DH moderada mientras que *Freedman, Allen y Sendarrubias(*3)(4)(5) incluyen también DH grave, aunque tanto Sendarrubias como Freedman excluyen pacientes con inestabilidad hemodinámica. Por otro lado, publicaciones realizadas en países como India y África, sólo incluyen pacientes con DH grave. Algunos de estos trabajos coinciden en excluir a los pacientes con desnutrición grave y diarrea prolongada *(Kartha, Mahajan y Houston)*(6)(7)(8)*.* Sin embargo, los estudios de *Alam*(9)(10) se centran específicamente en niños con desnutrición grave y DH aguda grave secundaria a GEA por cólera (<48 horas de evolución), con resultados favorables en términos de seguridad.

En cuanto a la edad, no existe consenso. Algunos investigadores excluyen de sus estudios a los niños menores de 6 meses (*Allen, Sendarrubias, Levy y Janet*)(4)(5)(11)(12), mientras que otros (*Nager,* *Freedman, Houston y Alam*)(1)(3)(8)(9) incluyen pacientes a partir de 3 meses de edad e incluso en algunos trabajos realizados en India se excluyen solamente los recién nacidos < 1 mes (*Kartha y Mahajan*)(6)(7). Freedman establece además como criterio de exclusión el peso menor a 5 kg o mayor a 33 kg.

La mayoría de los autores establecen como criterios de exclusión las patologías crónicas que pueden afectar al manejo de la volemia y/o a la regulación del equilibrio hidroelectrolítico (cardiopatías, patología renal, trastornos del metabolismo…)(1)(3)(4)(6)(7)(8)(9)(10)(13)(14), así como la sospecha de comorbilidad aguda (DH secundaria a otras causas distintas de la GEA) o patología quirúrgica(1)(3)(8)(9)(13)(14).

En cuanto a los parámetros analíticos solo algunos autores hacen referencia como criterio de exclusión a las alteraciones electrolíticas graves (fundamentalmente del sodio y del potasio)(1)(2)(5)(12)*.*

***DE LA EVIDENCIA A LA RECOMENDACIÓN***

Ante la ausencia de evidencia directa para definir las indicaciones y contraindicaciones de la RIR, el GT ha establecido, por consenso, unas recomendaciones basadas en la extrapolación de los criterios de inclusión y exclusión considerados en los distintos estudios, teniendo en cuenta el balance riesgo-beneficio puesto que no se puede establecer la seguridad y la eficacia de estas pautas en los perfiles de pacientes que, por su edad, patología de base o circunstancias particulares, no hayan sido incluidos en los estudios realizados.

Teniendo en cuenta la heterogeneidad de criterios de inclusión y exclusión en relación a la edad, el GT ha establecido por consenso la recomendación de utilizar pautas de RIR en niños a partir de los 3 meses de edad.

Los pacientes con DH grave pueden presentar signos de shock y requerir medidas de estabilización. Por lo tanto, el GT ha decidido no incluir la DH grave en las indicaciones generales de la RIR puesto que, si bien no se trata de una contraindicación absoluta, se considera más prudente realizar un manejo individualizado en estos pacientes.

La presencia de comorbilidad aguda o la sospecha de patología quirúrgica no se consideran contraindicaciones absolutas para la utilización de pautas de RIR, ya que probablemente el motivo de la exclusión de este tipo de pacientes en los trabajos de investigación esté más relacionado con el control de sesgos de selección que con la seguridad de la estrategia de rehidratación. Sin embargo, se debe tener presente que el objeto de este documento es establecer unas recomendaciones dirigidas específicamente a la RIR como tratamiento de la DH secundaria a GEA. En otros contextos clínicos, la DH se debe corregir atendiendo a su fisiopatología, el grado de DH del paciente y los parámetros analíticos. Siguiendo este mismo criterio de prudencia, este GT ha decidido considerar las alteraciones graves del sodio (<130 mEq/L o >150 mEq/L como contraindicación relativa de la RIR, recomendando en estos casos un manejo individualizado de la fluidoterapia.

En cuanto al coste, remontándose más allá de la última década podemos identificar estudios que han demostrado que las pautas de RIR reducen la proporción de ingresos y el tiempo de estancia en urgencias en pacientes con DH moderada secundaria a GEA, lo que supone un beneficio clínico para el paciente y también es beneficioso en términos de eficiencia(15)*.*

***RECOMENDACIÓN***

***¿EN QUÉ PACIENTES ESTA INDICADA LA REHIDRATACIÓN INTRAVENOSA RÁPIDA?***

Se recomienda utilizar pautas de RIR en niños con deshidratación leve-moderada secundaria a gastroenteritis aguda y fracaso o contraindicación de la rehidratación oral *(recomendación fuerte, evidencia alta)*

***¿EN QUÉ PACIENTES ESTA CONTRAINDICADA LA REHIDRATACIÓN INTRAVENOSA RÁPIDA?***

En nuestro medio, no se recomienda utilizar pautas de RIR en niños menores de 3 meses, pacientes con inestabilidad hemodinámica, alteraciones hidroelectrolíticas graves (sodio <130 mEq/L o >150 mEq/L) o enfermedad sistémica que afecte a la regulación hemodinámica y/o del equilibrio hidroelectrolítico *(recomendación fuerte, evidencia no disponible)*

## PREGUNTA 3: ¿ES NECESARIO REALIZAR ALGÚN CONTROL ANALÍTICO ANTES DE INICIAR LA RIR?

***COMENTARIO DE LA EVIDENCIA***

No se ha identificado ninguna RS ni ECA cuyo objetivo principal fuera establecer la indicación de realizar un control analítico previo al inicio de la RIR y por lo tanto no existe evidencia directa para establecer recomendaciones al respecto. No obstante, ampliando el intervalo temporal para la búsqueda bibliográfica se han identificado diversos trabajos cuyo objetivo es determinar la utilidad de distintos parámetros analíticos para evaluar el grado de DH del paciente, guiar la prescripción y/o ajuste de la rehidratación y predecir la necesidad de hospitalización. Los resultados de dichos trabajos son contradictorios y por lo tanto la calidad de la evidencia disponible es baja.

La RS de *Steiner*(16) concluye que el único parámetro de laboratorio que parece relacionarse con el grado de DH es el bicarbonato (niveles >17mEq/L reducen la probabilidad de tener una DH>5% en niños con GEA, con una *LR* negativa de 0,22 [IC95% 0.12-0.43]). De forma similar*Okoposio*(17)detecta diferencias significativas en los niveles de bicarbonato en función del grado de DH (leve: 19.88 ± 4.00mmol/L, moderada: 18.20 ± 3.59mmol/L y grave: 16.07 ± 5.67mmol/L; *p 0.001*) y *Parkin*(18) afirma que valores de bicarbonato <18mmol/L se asocian con DH moderada-grave (≥ 6%) (*LR+* 11.6; IC95% 3.5-38.0) por lo que recomienda su determinación junto con el pH (pH <7.32; *LR+* para DH ≥6%: 7.2; IC95% 2.4-21.9) en los pacientes en los que se canalice un acceso venoso, incorporando ambos parámetros a los algoritmos de decisión para estimar el grado de DH en niños con GEA. *Levy et al*(19) también describen una asociación estadísticamente significativa entre los valores de bicarbonato y el grado de DH (*ρ-Spearman*=0.19, *p* 0.011); no obstante, estos investigadores se centran en el papel de la cetonemia,demostrando que sus valores están elevados en niños con DH en contexto de GEA (especialmente si el tiempo de evolución de los síntomas es >24 horas) y que se correlacionan con el grado de DH de forma más potente que el bicarbonato (*ρ-Spearman* 0.22, *p* 0.003; *Wald* 5.51, *p* 0.019) y con la magnitud de la acidosis metabólica (*ρ-Spearman* –0.26, *p* <0.001). Los autores proponen la determinación de cetonemia “a pie de cama” en niños con GEA y DH, como herramienta útil para su evaluación clínica y la toma de decisiones terapéuticas.

En contraposición a estas publicaciones que avalan la utilidad del bicarbonato en la evaluación y manejo terapéutico del niño con DH secundaria a GEA, el estudio de *Freedman*(20), cuyo objetivo principal es analizar el valor del bicarbonato como factor predictor independiente de reconsultas no programadas en los 7 días posteriores a la visita índice, concluye que valores bajos de bicarbonato basal no se asocian con mala evolución clínica en pacientes DH con GEA que reciben RIV y posteriormente son dados de alta a domicilio. Según sus resultados, son los pacientes con niveles más altos de bicarbonato basal quienes tienen mayor probabilidad de reconsulta no programada (OR 1.1; IC95% 1.0–1.3; *p* 0.03). Además, los pacientes que precisan RIV o ingreso en esa segunda visita tienen también valores más altos de bicarbonato (21.2±4.6mEq/L, *p* 0.001 y 22.3±5.0mEq/L, *p* <0.001, respectivamente). Estos resultados concuerdan con lo publicado por otros autores(21)(22)(23).

El trabajo de *Martín del Barrio*(24) pone de manifiesto que la capacidad de los pediatras (adjuntos de urgencias y médicos residentes de pediatría) para predecir las alteraciones analíticas en niños con GEA es limitada (sensibilidad 64.6%) y que hasta en un 12.3% de los pacientes, estas alteraciones analíticas inesperadas produjeron un cambio en el tratamiento inicial. También detectan una asociación significativa entre ciertos parámetros de laboratorio y el tiempo de estancia hospitalaria, de forma que valores de bicarbonato >12.7mmol/L, sodio ≤149mmol/L, urea ≤52mg/dl y creatinina ≤0.73mg/dl predicen estancias <24 horas. Los autores sugieren que la determinación de estos parámetros podría contribuir a seleccionar pacientes candidatos a ser manejados en unidades de corta estancia.

*Hayajneh*(25)concluye que la determinación de ciertos parámetros bioquímicos resulta útil para discriminar entre DH grave y leve-moderada (valores del *área bajo la curva*: urea 0.991[IC95% 0.980–1.001], sodio 0.862[IC95% 0.746–0.978], creatinina 0.850[IC95% 0.751–0.949], potasio 0.69[IC95% 0.555–0.824] y glucosa 0.684[IC95% 0.574–0.795]); siendo la urea el parámetro analítico con mayor rentabilidad diagnóstica (sensibilidad del 100% y especificidad del 97% para DH grave estableciendo como punto de corte un valor de 10mmol/L [60.07mg/dl]).

Según la GPC para el manejo de la GEA en niños en Europa(26), el bicarbonato es el único parámetro de laboratorio que parece tener alguna correlación con el grado de DH, de tal forma que valores normales de bicarbonato disminuyen significativamente la probabilidad de que el paciente presente una DH >5% (recomendación débil, baja evidencia). No obstante, los autores consideran que no hay evidencia suficiente acerca de la utilidad de las alteraciones del bicarbonato y otros parámetros bioquímicos para estimar el grado de DH del paciente. A pesar de la limitación en la calidad de la evidencia disponible, la guía recomienda solicitar un perfil de iones en niños con DH grave y aquellos con DH moderada cuya anamnesis y hallazgos en la exploración física sean inconsistentes con una diarrea grave *(recomendación fuerte, baja evidencia)* y también de forma general en todos los niños que precisen RIV, puesto que las alteraciones de la natremia pueden requerir ajustes en el ritmo de la fluidoterapia *(recomendación fuerte, baja evidencia).*

La guía NICE 2015 de fluidoterapia IV en niños hospitalizados(27) recomienda la realización de una analítica sanguínea (hemograma, glucosa, urea, creatinina e iones) y la determinación de iones en orina en los niños que vayan a recibir fluidoterapia IV. Se recomienda monitorizar la glucemia y los iones en sangre antes de iniciar la sueroterapia y posteriormente cada 24 horas o con más frecuencia si hay alteraciones electrolíticas y/o riesgo de hipoglucemia.

***DE LA EVIDENCIA A LA RECOMENDACIÓN***

Teniendo en cuenta la bibliografía revisada, no se encuentra evidencia que justifique la realización sistemática de una analítica sanguínea en todos los pacientes con GEA. Sin embargo, teniendo en cuenta las limitaciones de la anamnesis y la exploración física para predecir alteraciones hidroelectrolíticas clínicamente relevantes en pacientes sin signos clínicos de DH o con DH leve, así como la posibilidad de detectar alteraciones que requieran ajustes en el tratamiento pautado (composición del suero, ritmo…), parece prudente recomendar la determinación de ciertos parámetros analíticos en pacientes seleccionados, incluyendo aquellos que vayan a recibir RIV, tal como establecen las Guías(26)(27). Se debe tener en cuenta además que este GT, en consonancia con otros autores(1)(2)(5)(12)ha decidido considerar las alteraciones graves de la natremia (sodio <130mmol/L o >150mmol/L) como contraindicación para la utilización rutinaria de la RIR, por lo que su determinación sería necesaria para poder individualizar la estrategia de rehidratación en caso de hipo/hiper-natremia grave.

Por otra parte, tal como apuntan algunos autores, ciertos parámetros analíticos (bicarbonato, sodio, urea, creatinina) pueden contribuir a discriminar entre DH grave y leve-moderada(25) así como a identificar pacientes candidatos a recibir tratamiento en unidades de corta estancia(24), facilitando la dinámica asistencial y evitando costes directos e indirectos derivados de ingresos más prolongados.

En relación a la cetonemia, su utilidad para predecir el grado de DH en niños con GEA ha sido objeto de pocos estudios y por lo tanto la evidencia disponible es escasa. No obstante, este GT considera que este parámetro es importante para seleccionar la composición óptima del suero de RIR, tal como se discutirá en el apartado correspondiente, y por lo tanto sugiere su determinación si está disponible.

***RECOMENDACIÓN***

***¿ES NECESARIO REALIZAR ALGÚN CONTROL ANALÍTICO ANTES DE INICIAR LA REHIDRATACIÓN INTRAVENOSA RÁPIDA?***

Se recomienda realizar analítica sanguínea (incluyendo gasometría venosa, iones, glucosa, urea y creatinina) a todos los niños a los que se canalice un acceso venoso para administrar rehidratación intravenosa (*recomendación fuerte, evidencia baja*)

*Se sugiere determinar la cetonemia si está disponible (recomendación débil, evidencia baja)*

## PREGUNTA 4: ¿QUÉ CONTROLES CLÍNICOS SE DEBEN REALIZAR DURANTE LA RIR?

## PREGUNTA 5: ¿SE DEBE REALIZAR ALGÚN CONTROL ANALÍTICO TRAS FINALIZAR RIR?

***COMENTARIO DE EVIDENCIA***

No se ha identificado ninguna publicación cuyo objetivo principal fuera establecer la indicación de realizar controles clínicos y/o analíticos durante la RIR o al finalizar la misma y por lo tanto no existe evidencia directa para establecer recomendaciones al respecto.

No obstante, cada uno de los estudios revisados establece en su metodología una serie de controles clínicos y analíticos para dar respuesta a sus objetivos, ya sea para determinar la respuesta de los pacientes a la intervención y/o para monitorizar la posible aparición de EA. El tipo de controles realizados y su frecuencia o momento de realización varían en función del diseño del estudio.

Según la Guía de la ESPGHAN(26) el porcentaje de pérdida de peso corporal es la mejor forma de medir el grado de DH y la ganancia de peso post-enfermedad se considera el criterio estándar para valorar la severidad de dicha DH *(recomendación débil, evidencia baja)*. De hecho, algunos de los trabajos revisadosdeterminan el peso corporal post-rehidratación(1)(10)o post-enfermedad(8) como *“gold standard”* para estimar el déficit de líquidos real de los pacientes incluidos en el estudio. En el estudio de *Alam*(9)***,*** el peso post-rehidratación se utiliza como variable resultado para comparar el éxito de las pautas de RIR utilizadas. Sin embargo, el valor del incremento de peso corporal post-enfermedad para evaluar el grado de DH en niños ha sido cuestionado por diversos autores(28)(29)(30)(31).

Prácticamente todos los autores coinciden al utilizar la revaluación periódica del grado de DH del paciente, como variable resultado para valorar el éxito de la rehidratación. En la bibliografía revisada las escalas más utilizadas para estimar el grado de DH son la escala de la OMS (6)(7)(10)(13) ***,*** la escala de Gorelick(4)(5)(12) y la “*Clinical Dehydration Score”*(3)***.*** Existe una gran heterogeneidad en cuanto al momento y la frecuencia con la que se realizan estas revaluaciones, en función del diseño de los estudios (población de estudio, ámbito en el que se desarrolla, objetivo, tipo de intervención).

Otros aspectos clínicos monitorizados en las publicaciones revisadas son las constantes vitales y la aparición de EA (signos de sobrecarga de volumen, extravasación de vía…)(1)(3)(4)(5)(6)(8)(10)(11)(12)***,*** aunque éstos no siempre están bien definidos en la metodología de los estudios. Cabe destacar que los protocolos de estudio de aquellos trabajos realizados en India y Bangladesh con pacientes que presentaban DH grave(6)(7)(9)(10)(13) incluyen la cuantificación y registro de todas las entradas (volumen de suero IV administrado, volumen de líquidos por vía oral, ingesta) y salidas (vómitos, deposiciones y control de diuresis), realizando reposición de las pérdidas continuadas de forma simultánea a la pauta de RIR establecida. En cuanto a los trabajos realizados en países desarrollados, solamente *Nager*(1)contempla en su metodología la realización de ese balance de entradas y salidas. La guía NICE de fluidoterapia IV en niños(27) recomienda registrar las pérdidas continuadas y realizar balance de entradas y salidas con registro horario, incluyendo el balance acumulado.

En cuanto a los controles analíticos la guía NICE(27) recomienda monitorizar la glucosa y los electrolitos al menos cada 24 horas en los niños que reciben fluidoterapia IV, considerando realizar controles más frecuentes en caso de alteración de alguno de los parámetros bioquímicos. En la bibliografía revisada la mayoría de los autores coinciden en la monitorización de los electrolitos (sodio, potasio, cloro)(1)(3)(4)(6)(7)(9)(10)(13), el equilibrio ácido-base(1)(3)(4)(5)(6)(12)y la función renal(1)(3)(6)(8)(10)(12)***.*** También es frecuente realizar controles de glucemia(3)(5)(11)(12) y, en aquellos estudios que utilizan sueros isotónicos con glucosa para la RIR(5)(11)(12), también de cetonemia. Estos controles analíticos se realizan una vez completada la pauta de RIR y, por lo tanto, el momento exacto varía en función del diseño del estudio, siendo lo más habitual su determinación entre las 2 y las 4 horas. No obstante, se debe tener presente que dichos controles analíticos se realizan en el contexto de proyectos de investigación para dar respuesta a los objetivos planteados en el estudio y detectar posibles EA relacionados con la intervención.

***DE LA EVIDENCIA A LA RECOMENDACIÓN***

Ante la ausencia de evidencia directa para definir los controles clínicos y analíticos necesarios durante la RIR y al finalizar la misma, este GT ha establecido por consenso, unas recomendaciones basadas en la extrapolación de los controles realizados en los estudios revisados y su rentabilidad para la toma de decisiones clínicas y el ajuste del tratamiento del paciente.

Considerando la baja calidad de la evidencia disponible, la determinación del peso corporal post-rehidratación, más allá del ámbito de la investigación, parece una estrategia poco rentable y poco operativa en UP.

Para monitorizar la evolución clínica del paciente y guiar la estrategia terapéutica, en base a la bibliografía revisada, existe unanimidad entre los miembros de este GT a la hora de recomendar la revaluación periódica del grado de DH utilizando escalas validadas, la vigilancia de signos de sobrecarga de volumen y la realización de balances de entradas y salidas.

Teniendo en cuenta la baja frecuencia con la que se notifican alteraciones de los parámetros bioquímicos en los controles analíticos post-rehidratación, no parece justificado su realización de forma rutinaria. No obstante, se debe valorar en aquellos pacientes que presentan alteraciones relevantes en la analítica basal.

***RECOMENDACIÓN***

***¿QUÉ CONTROLES CLÍNICOS SE DEBEN REALIZAR DURANTE LA REHIDRATACIÓN INTRAVENOSA RÁPIDA?***

Se recomienda realizar los siguientes controles clínicos durante la Rehidratación Intravenosa Rápida (*recomendación fuerte, evidencia baja*):

- **Constantes vitales**: frecuencia cardiaca y tensión arterial (al menos en la valoración inicial)
- **Examen físico**: estado general, grado de deshidratación (se recomienda utilizar escalas validadas) y signos de sobrecarga de volumen
- **Balance hídrico** (entradas y salidas)

La frecuencia con la que se deben realizar estos controles dependerá de la situación clínica del paciente y de su evolución.

***¿SE DEBE REALIZAR ALGÚN CONTROL ANALÍTICO TRAS FINALIZAR LA REHIDRATACIÓN INTRAVENOSA RÁPIDA?***

Se recomienda realizar un control analítico (iones, glucosa, urea, creatinina, gasometría venosa) en aquellos pacientes con alteraciones relevantes en la analítica basal o evolución clínica desfavorable (*recomendación fuerte, evidencia baja*).

## PREGUNTA 6: ¿A QUÉ RITMO DE INFUSIÓN SE DEBE ADMINISTRAR LA RIR?

## PREGUNTA 7: ¿DURANTE CUÁNTO TIEMPO SE DEBE MANTENER LA RIR?

***COMENTARIO DE LA EVIDENCIA***

Para responder a esta pregunta se identificaron 2 GPC(26)(32), 2 RS(33)(34) y 4 ECAs(1)(2)(3)(8), tres de los cuales(1)(2)(3) estaban incluidos en las RS analizadas. Los desenlaces de interés y la calidad de la evidencia disponible para cada uno de ellos se resumen en la tabla 4. El análisis GRADE del nivel de calidad de evidencia asignado se detalla en el anexo 6.

La OMS(32) establece como pauta de RIV para niños con DH grave secundaria a GEA el llamado Plan C, que consiste en la administración de 100ml/kg de RL en un periodo de 3 a 6 horas en función de la edad (6 horas para menores 1 año y 3 horas para los mayores), añadiendo bolos adicionales de SS0.9% en caso de shock. Sin embargo, la evidencia que respalda esta recomendación es muy escasa y, si bien podría ser una estrategia adecuada para la diarrea secretora típica del cólera, probablemente no debería generalizarse al tratamiento de la diarrea de otras etiologías, que son más frecuentes a nivel mundial(34). *Houston*(8) compara el Plan C de la OMS con una estrategia de rehidratación más lenta (100ml/kg durante 8 horas, sin bolos extra, independientemente de la edad), concluyendo que ambas pautas son equiparables en términos de eficacia (tiempo para corregir la DH [*p* 0,90], recuperar la tolerancia oral [*p* 0,27] y tiempo de estancia hospitalaria [*p* 0,80]) y seguridad(mortalidad-EA graves [RR 0,67 (IC95% 0,12-3,85); *p* 0,065] y disnatremias [*p* 0,32]). Los autores señalan que durante el estudio fue necesario reforzar la adhesión al “Plan C”, debido a la mayor complejidad de esta pauta y apuntan a que la simplicidad de la pauta “lenta” podría facilitar la adherencia a este protocolo de rehidratación. Según la revisión de Iro(34) no hay evidencia de alta calidad para apoyar las recomendaciones de la OMS en relación a la RIV en niños con DH grave secundaria a GEA.

En nuestro medio, la pauta de RIR más extendida coincide con las recomendaciones de la Guía ESPGHAN 2014(26)**.** Esta guía establece como estrategia inicial para la mayoría de pacientes que requieren RIV, la RIR con 20ml/kg/h durante 2 a 4 horas, seguida de RHO o sueroterapia de mantenimiento *(recomendación fuerte, evidencia de calidad moderada)*. Esta guía no recomienda la utilización de pautas “ultrarrápidas” (ritmos de infusión >20ml/kg/h), ya que sus autores concluyen que pueden asociarse con alteraciones electrolíticas y tiempos de estancia hospitalaria más prolongados *(recomendación fuerte, evidencia de baja calidad).*

Las RS analizadas(33)(34) incluyen ECAs(1)(2)(3) que comparan distintas pautas de rehidratación que se podrían englobar en el concepto de “ultrarrápidas” (ritmo de infusión >20ml/kg/h) con otras pautas que tendrían la consideración de RIR “estándar”. Estas RS avalan las recomendaciones de la ESPGHAN(26)ya que, según sus conclusiones, las llamadas pautas “ultrarrápidas” no han demostrado ser superiores a la RIR “estándar” y por lo tanto, no hay evidencia que justifique su utilización.No obstante, a la hora de interpretar sus resultados cabe destacar la heterogeneidad en el diseño de la intervención y en las variables resultado de los estudios incluidos, así como la baja calidad de la evidencia que aporta alguno de ellos(2).

Centrándose en la seguridad, solamente el estudio de *Houston*(8)***,*** que se desarrolla en Uganda y Kenia incluyendo pacientes con DH grave, reporta casos de mortalidad (2 en cada grupo) y EA graves (5% en el grupo “Plan C” y 3% en el grupo “lento”), sin encontrar diferencias significativas entre ambos grupos (*p* 0,065). La revisión de *Iro*(34), cuya principal variable resultado es la mortalidad, no recoge ningún fallecimiento ni tampoco ningún EA que hubiese sido definido como variable de seguridad en su protocolo de estudio. Los autores comentan que no fue posible realizar un análisis agrupado de los EA debido a la heterogeneidad de los estudios incluidos. Según *Toaimah*(33) los trabajos incluidos en su RS no tienen potencia suficiente para analizar aspectos de seguridad. Analizando los estudios individualmente, no se detectan diferencias en la seguridad de las pautas comparadas en cada uno de ellos. En el trabajo de *Nager*(1) ningún paciente presentó EA relacionados con la fluidoterapia administrada ni complicaciones derivadas de alteraciones electrolíticas. *Freedman*(3)describe como EA 2 extravasaciones de vía (1 en cada grupo), 6 casos de edema periférico (4 en el grupo “estándar” y 2 en el grupo “ultrarrápida”, *p* 0,44) y 2 casos de disnatremia (1 hiponatremia en cada grupo). En relación a la evolución del sodio, no encuentra diferencias entre grupos a las 4 horas (“estándar” 137,5mmol/L (DE 2,0) *vs* “ultrarrápida” 138,0mmol/L (DE 2,0); *p* 0,06). En un subanálisis publicado posteriormente(14)los autores concluyen que su pauta “ultrarrápida” es segura ya que no aumenta el riesgo de desarrollar hiponatremia a corto plazo y favorece la resolución de la hiponatremia en pacientes con valores basales de sodio bajos.

Comparando la eficacia clínica de ambas estrategias de RIR, *Iro*(34) realiza un metaanálisis de los estudios incluidos sin encontrar diferencias en la proporción de ingresos (RR 1,30; IC95% 0,87-1,93) ni reconsultas (RR 1,39; IC95% 0,68-2,85). Sin embargo, el estudio considerado de mejor calidad metodológica(3) reporta mayor porcentaje de ingresos (29% *vs* 17%, *p* 0,04), así como mayor tiempo de estancia en urgencias (6,5 *vs* 5,0 horas, *p* 0,03) en el grupo que recibe la pauta ultrarrápida. Ninguna de las dos pautas demostró superioridad en el resto de variables resultado analizadas en este trabajo (resolución de la DH a las 2 horas [*p* 0,32], necesidad de “tratamiento prolongado” [*p* 0,19], tolerancia oral a las 2 y 4 horas [*p* 0,31 y 0,69, respectivamente] y reconsultas a las 72 horas [*p* 0,69]).

En cuanto a los parámetros bioquímicos, *Freedman*(3) encuentra diferencias en la evolución del bicarbonato a favor de la RIR estándar (+0,56mmol/L (DE 1,9) *vs* -0,31mmol/L (DE 2,2); *p* 0,01). Los autores apuntan a que el descenso de bicarbonato en los pacientes que reciben la pauta “ultrarrápida” podría estar en relación con la sobrecarga de cloro secundaria a la infusión de un volumen importante de suero isotónico. No obstante, los autores no detectan diferencias en el pH y no recogen los niveles de cloro basales y post-rehidratación. *Nager*(1) solamente detecta diferencias significativas en la densidad urinaria post-rehidratación (“Ultrarrápida” 1016±7.5 *vs* “estándar” 1020±8.3; *p* 0,028). Los estudios revisados no reportan diferencias clínicamente relevantes en otros parámetros analíticos(1)(3).

En la bibliografía revisada no se han encontrado referencias al ritmo de infusión máximo. Solamente en el protocolo de estudio de *Freedman*(3)registrado en clinicaltrials.gov(35) se establece como límite máximo 999ml/hora.

Más allá de la recomendación establecida por la ESPGHAN(26) no se ha encontrado evidencia directa para establecer una recomendación en cuanto a la duración de la RIR. En los trabajos de RIR realizados en nuestro medio, que incluyen mayoritariamente pacientes con DH moderada, el periodo de intervención del estudio suele ser de 1 o 2 horas. Solamente en aquellos estudios basados en el Plan C de la OMS, realizados en países en vías de desarrollo en pacientes con DH grave, los tiempos de rehidratación son de 3 a 6 horas.

***DE LA EVIDENCIA A LA RECOMENDACIÓN***

En base a la bibliografía revisada, no se ha identificado evidencia que justifique la utilización de las llamadas pautas “ultrarrápidas”. Por lo tanto nuestra recomendación, en consonancia con la Guía de la ESPGHAN(26), es utilizar el ritmo de infusión considerado “estándar” para la RIR (20ml/kg/h). Ante la ausencia de evidencia este GT ha establecido por consenso de sus miembros, en base a su práctica clínica habitual y a los protocolos de RIR utilizados en sus respectivos centros, un límite máximo de infusión de 700ml/h.

Se debe tener presente además que los resultados del estudio de *Freedman*(3)apuntan a una peor evolución clínica (mayor proporción de ingresos y persistencia de acidosis metabólica) de los pacientes que reciben la pauta “ultrarrápida”. Los autores sugieren como una de las posibles causas para estos resultados la sobreestimación del grado de DH con las escalas clínicas; de tal manera que, la mayoría de los pacientes incluidos no precisan un volumen total de suero de rehidratación de 60ml/kg para reponer su déficit. Es imprescindible realizar una estimación lo más precisa posible del grado de DH y realizar controles clínicos periódicos, para ajustar el volumen total de líquidos necesario para reponer el déficit, es decir, el tiempo que se debe mantener la RIR. Teniendo en cuenta que el presente documento se centra en establecer recomendaciones generales para la RIR en pacientes con “DH leve-moderada” secundaria a GEA, los pacientes a los que van dirigidas estas recomendaciones tendrán un déficit estimado del 3 al 9% (equivalente a 30-90ml/kg). En este contexto y considerando el riesgo de sobreestimar el déficit al utilizar escalas clínicas de DH, este GT considera razonable mantener la RIR durante un periodo de 1 a 4 horas (volumen total de suero 20-80ml/kg), en función del grado de DH inicial y de la evolución clínica del paciente (mejora del estado de hidratación, balances).

***RECOMENDACIÓN***

***¿A QUÉ RITMO DE INFUSIÓN SE DEBE ADMINISTRAR LA REHIDRATACIÓN INTRAVENOSA RÁPIDA?***

Se recomienda administrar la RIR a 20ml/kg/h (recomendación fuerte, evidencia alta).

Se sugiere como límite máximo de infusión 700ml/h (recomendación débil, evidencia no disponible)

***¿DURANTE CUÁNTO TIEMPO SE DEBE MANTENER LA REHIDRATACIÓN INTRAVENOSA RÁPIDA?***

Se recomienda mantener la RIR durante 1-4 horas, dependiendo del déficit estimado y de la evolución clínica del paciente (recomendación fuerte, evidencia moderada).

## PREGUNTA 8: ¿QUÉ TIPO DE SUERO SE DEBE UTILIZAR PARA REALIZAR LA RIR?

***COMENTARIO DE LA EVIDENCIA***

La evidencia actual, de alta calidad, sugiere que el uso de soluciones isotónicas para la RIV en niños con GEA es seguro y efectivo(28)(36)(37)(38)(39)(40), puesto que no solo previenen el desarrollo de hiponatremia, sino que también son superiores a los fluidos hipotónicos para expandir el espacio intravascular y corregir el déficit de volumen de forma más rápida(4)(41)(42). Los fluidos hipotónicos no son apropiados para la rehidratación en pacientes con GEA, ya que en este contexto existen diversos estímulos tanto hemodinámicos, secundarios a la depleción de volumen, como no hemodinámicos, relacionados con el dolor o las náuseas, que producen un aumento de secreción de hormona antidiurética que se traduce en retención de agua libre y riesgo potencial de hiponatremia dilucional. En un estudio retrospectivo en niños entre 1 mes y 12 años con DH isonatrémica secundaria a GEA rehidratados con sueros hipotónicos encontraron una incidencia de hiponatremia adquirida del 18,5%(43).

Sin embargo, no hay suficiente evidencia acerca de qué tipo de suero isotónico es el ideal. De ahí que no exista un criterio homogéneo en la elección del tipo de cristaloide. Los desenlaces de interés y la calidad de la evidencia disponible para cada uno de ellos se resumen en la tabla 5. El análisis GRADE del nivel de calidad de evidencia asignado se detalla en el anexo 7.

Las publicaciones revisadas(28)(32)(44)(45)(46)(47)(48) recomiendan la rehidratación con líquidos isotónicos, pudiendo utilizar indistintamente SS0.9% o RL. En EEUU y Europa el SS0.9% es el tipo de cristaloide más utilizado. La pérdida de fluidos asociada a la GEA no solo causa DH, sino que también puede producir acidosis metabólica y alteraciones electrolíticas. Está descrito que la infusión de grandes cantidades de SS0.9% en pacientes críticos puede exacerbar los bajos niveles de bicarbonato frecuentemente asociados a la diarrea y a la disminución de la perfusión tisular secundaria a la DH, produciendo acidosis metabólica hiperclóremica, daño renal agudo y dolor abdominal(49)(50)(51)(52). El riesgo potencial de desarrollar hipernatremia y acidosis hiperclorémica del SS0.9% ha condicionado la aversión de algunos autores a recomendar su uso. Sin embargo, se ha demostrado que el riesgo de hipernatremia con soluciones isotónicas es bajo, frente al riesgo de hiponatremia dilucional asociado al uso de sueros hipotónicos(14)(53)(54).

En cuanto a la acidosis hiperclorémica, existen soluciones cristaloides balanceadas que contienen niveles fisiológicos de cloro y *buffers* (acetato, lactato, glucotano) como RL y Plasma Lyte-A (PLA). El PLA es una solución isotónica balanceada libre de calcio que contiene electrolitos en concentraciones similares al plasma. En cuanto al RL, aunque se considera isotónico, su concentración de sodio es menor que la del plasma, por lo que sería más correcto denominarlo “casi isotónico”(6)(48). Por otro lado proporciona lactato que, en pacientes con función hepática normal, se transforma en bicarbonato a través del metabolismo hepático, compensando las pérdidas de las deposiciones diarreicas. Algunos autores sugieren que el uso de estas soluciones balanceadas evitaría los posibles EA derivados de la infusión de SS0.9%. Sin embargo, según un ECA realizado en adultos hospitalizados, comparando PLA con SS0.9%, ambos tipos de suero son equiparables en cuanto al desarrollo de daño renal(55)(56).

Para responder a la pregunta planteada, se identificaron 3 ECAs(4)(6)(7); dos de los cuales comparaban SS0.9% frente a RL y otro SS0.9% frente a PLA (tabla 5).

*Mahajan*(7) diseña un ensayo clínico comparando la RIR con RL frente SS0.9% en niños con DH grave secundaria a diarrea aguda, considerando como variable principal la mejoría en el pH, sin encontrar diferencias entre grupos. Tampoco hallan diferencias en los cambios del cloro y del sodio respecto a sus valores basales. Sin embargo, sí que detectan valores más elevados de bicarbonato en el grupo de RL (*p=*0,02) y valores más bajos de potasio en el grupo de SS0.9% (*p=*0,03). Una de las principales limitaciones de este trabajo es que la muestra es pequeña, de solo 22 pacientes. Según sus resultados los pacientes rehidratados con RL precisaron menos cantidad de fluidos tanto IV como orales y tuvieron una estancia hospitalaria más corta. No obstante, el estudio no fue diseñado para esto, por lo que estos datos deben ser interpretados con cautela, como los propios autores reconocen. Por otra parte, también se debe tener en cuenta que se trata de un estudio realizado en pacientes con DH grave, donde la principal causa de diarrea fue el *Vibrio Cholerae* (55%), por lo que los resultados son poco extrapolables a nuestro medio.

En el estudio de *Kartha*(6) también comparan el RL con SS0.9%, sin encontrar diferencias entre ambos grupos en las variables estudiadas (clínicas: resolución de signos de DH grave y estancia hospitalaria; analíticas: pH, bicarbonato, electrolitos y parámetros de función renal). *Kartha* no describe EA relacionados con alteraciones electrolíticas. Aunque sus resultados no demuestran superioridad de ninguno de los sueros estudiados, el coste del tratamiento con RL fue mayor, por lo que los autores concluyen que el SS0.9% debe usarse como primera línea de tratamiento.

Por último, el estudio de *Allen*(4), compara el PLA con SS0.9%, encontrando diferencias estadísticamente significativas pero clínicamente poco relevantes en la evolución del bicarbonato tras la RIR. A la hora de interpretar estos datos se debe tener presente que solamente 3 pacientes en el Grupo PLA y ninguno en el Grupo SS0.9% presentaron acidosis grave (HCO3 <12mEq/L). En cuanto a la mejoría del estado de hidratación, la puntuación en la escala de Gorelick a las 2 horas fue mejor en los pacientes que recibieron PLA, sin diferencias a las 4 horas. Los autores sugieren que los pacientes del Grupo PLA mejoran antes que los tratados con SS0.9%, en términos de corrección de la acidosis metabólica y resolución de los signos clínicos de DH.

*Allen*(4) describe dos hiponatremias leves (131-135mEq/L) sin repercusión clínica (1 en cada grupo); no se detectan hiponatremias graves ni hipernatremias. Cabe destacar que 8 pacientes (10,4%) presentaron hipopotasemia a las 4 horas (2/39 [5,1%] en el Grupo PLA y 6/38 [15,8%] en el Grupo SS0.9%). Según sus resultados el PLA produce menos alteraciones en los niveles séricos de electrolitos (potasio, cloro), aunque las diferencias detectadas parecen poco relevantes clínicamente.

**DE LA EVIDENCIA A LA RECOMENDACIÓN**

En los estudios revisados se muestra que las 3 soluciones comparadas (SS0.9%, RL y PLA), son eficaces y seguras para el tratamiento de la DH secundaria a GEA en niños. Las soluciones balanceadas no han demostrado claras ventajas respecto al SS0.9%. Si bien, el estudio de *Mahajan*(7) encuentran mejoría de los valores de bicarbonato con el uso de RL frente a SS0.9%, estos cambios parecen poco relevantes clínicamente y con poca traducción en el resultado final en cuanto a mejoría del pH. Además dichos resultados no concuerdan con los de *Kartha*(6)*,* que no encuentra diferencias significativas entre grupos. Por otro lado, el estudio de *Allen*(4) encuentra mejoría de los niveles de bicarbonato y menos alteraciones en los niveles séricos de electrolitos (potasio, cloro) en pacientes con PLA, lo que parece inclinar la balanza a favor del mismo. Sin embargo, las diferencias en los parámetros analíticos aunque significativas parecen poco relevantes clínicamente, y no se traducen en una disminución de los ingresos, el tiempo de rehidratación o la cantidad de fluidos recibidos.

Solamente el estudio de *Kartha*(6) hace algún análisis económico, considerando únicamente el coste del suero utilizado para la rehidratación, a favor del SS0.9% frente al RL.

Dado que el SS0.9% es el más extendido en nuestro medio y que actualmente no existen evidencias de claros beneficios de otras soluciones frente al mismo se propone su utilización como primera opción para la realización de RIR. No obstante, las soluciones balanceadas también serían una alternativa adecuada.

***RECOMENDACIÓN***

***¿QUÉ TIPO DE SUERO SE DEBE UTILIZAR PARA REALIZAR LA REHIDRATACIÓN INTRAVENOSA RÁPIDA?***

Se recomienda el uso de soluciones isotónicas para las pautas de rehidratación rápida (recomendación fuerte, evidencia alta)

Se sugiere como primera opción el SS 0,9%, pudiendo utilizar como alternativa Ringer Lactato o Plasmalyte A (recomendación débil, evidencia baja)

## PREGUNTA 9: ¿ES NECESARIO AÑADIR GLUCOSA AL SUERO DE REHIDRATACIÓN?

***COMENTARIO DE LA EVIDENCIA***

Los niños con DH secundaria a GEA presentan frecuentemente una acidosis metabólica de origen multifactorial. Uno de los factores contribuyentes es el incremento de la concentración plasmática de cuerpos cetónicos secundario al metabolismo de los ácidos grasos libres (lipolisis) estimulado por el glucagón, cuya secreción aumenta en un contexto de aporte insuficiente de carbohidratos (escasa ingesta, vómitos y/o malabsorción intestinal secundaria a la diarrea). Esta situación de cetosis y acidosis metabólica puede contribuir al fracaso de la tolerancia oral por la persistencia de las náuseas y los vómitos (11)(57).

Algunos autores(37)(58)(59) han planteado la hipótesis de que la administración de glucosa en el suero de rehidratación permitiría reducir rápidamente los niveles de cetonemia, al estimular la secreción de insulina e inhibir la de glucagón, bloqueando la lipolisis. La resolución de la cetosis podría contribuir a la recuperación de la tolerancia oral, reduciendo el riesgo de fracaso del manejo ambulatorio de estos pacientes.

Los resultados del estudio retrospectivo de *Levy* publicado en 2007(23)mostraron que los niños con DH secundaria a GEA que habían precisado rehidratación IV y no habían recibido glucosa IV en una primera visita tenían mayor probabilidad de reconsulta no programada con ingreso (OR3.9, IC95% 1.8–8.7). Los pacientes que habían recibido mayor cantidad de glucosa IV en esa visita índice tenían menor probabilidad de reconsultar de forma no programada, independientemente del volumen total de líquidos recibido; de tal forma que por cada 500mg/kg de glucosa IV el riesgo de reconsulta no programada con ingreso se reducía 1.9 veces (OR1.9, IC95% 1.1–3.4).

En la búsqueda bibliográfica realizada se han identificado un metaanálisis(60) que incluye 2 ECAs(5)(11) y un estudio observacional(12). Los desenlaces de interés y la calidad de la evidencia disponible para cada uno de ellos se resumen en la tabla 6. El análisis GRADE del nivel de calidad de evidencia asignado se detalla en el anexo 8.

Según el metaanálisis de *Grigsby*(60), la evidencia científica disponible actualmente no justifica la administración rutinaria de glucosa en el suero de RIR para niños sanos con DH secundaria a GEA, ya que los estudios publicados no han demostrado un efecto beneficioso sobre la evolución clínica, los ingresos ni las reconsultas. No obstante, debido a las limitaciones de la calidad de la evidencia revisada tampoco se pueden establecer recomendaciones en contra de su uso. Los dos ECAs(5)(11) incluidos en el metaanálisis tienen algunas limitaciones metodológicas y utilizan distintas pautas de rehidratación y sueros con distintas concentraciones de glucosa, lo cual podría condicionar efectos diferentes en las variables resultado. Por otra parte, los intervalos de confianza de la estimación del efecto de la glucosa sobre la proporción de ingresos y reconsultas son bastante amplios e incluyen la posibilidad de que la utilización de sueros con glucosa para la RIR pudiese aportar beneficios clínicos relevantes que la potencia del análisis estadístico no haya podido detectar.

En el metaanálisis de *Grigsby*(60) no fue posible realizar un análisis agrupado de otros desenlaces de interés considerados en esta revisión. Analizando los estudios individualmente, sus resultados confirman que la RIR con sueros isotónicos con glucosa

es eficaz para corregir la DH secundaria a GEA. Sin embargo, los ECAs publicados(5)(11)no han logrado demostrar su superioridad en términos de éxito de la rehidratación (analizado en ambos trabajos), recuperación de la tolerancia oral o tiempo de estancia en urgencias (variables analizadas solamente en el estudio de Levy)(11).

En relación a la cetonemia, los autores(10)(23) coinciden en que la administración de glucosa en el suero de rehidratación favorece que sus niveles desciendan rápidamente. No obstante, la repercusión clínica de la resolución de la cetosis no está bien establecida.

En términos de seguridad, no se han reportado EA en ninguno de los estudios revisados. No obstante, los EA no siempre están bien definidos a priori en el protocolo de estudio, lo cual puede conducir a una infranotificación de los mismos.

Finalmente, se debe considerar el efecto de la composición del suero de RIR sobre la glucemia. En los estudios revisados no se reportan hipoglucemias sintomáticas en ninguno de los grupos de tratamiento. Cabe destacar que *Sendarrubias*(5) detecta diferencias significativas en la evolución de la glucemia al finalizar la pauta de RIR (SS0.9% -17mg/dl *vs* SGS2.5% +30mg/dl; *p* <0,001)*.* Según los resultados de *Levy*(11), 1 hora después de iniciar la RIR todos los pacientes con hipoglucemia basal (<60 mg/dl) que recibieron SGS5% tenían una glucemia normal, mientras que todos aquéllos a los que se administró SS0.9% continuaban hipoglucémicos; en este grupo se sumaron además 12 pacientes que partían de una glucemia inicial normal y desarrollaron hipoglucemia tras la intervención. En cuanto a la hiperglucemia, no se reporta ningún caso con sintomatología clínica y el volumen urinario analizado en el estudio de *Levy*(11) fue similar en ambos grupos. *Sendarrubias*(5) comunica cuatro casos de hiperglucemia (>200mg/dl) en el grupo SGS2.5% y ninguno en el grupo SS0.9%. *Levy*(11) no reporta ninguna hiperglucemia, pero la mediana de la glucemia en el grupo SGS5% fue de 272mg/dl (221-361) al cabo de 1 hora y de 154mg/dl (121-221) a las 2 horas, frente a los valores en el grupo SS0.9% (70mg/dl [57-86] y 106mg/dl [87-172], respectivamente). En definitiva, si bien la calidad de la evidencia disponible es limitada, los resultados de los estudios sugieren que la utilización de sueros isotónicos con glucosa permite normalizar la glucemia en aquellos pacientes con hipoglucemia inicial sin provocar hiperglucemias clínicamente relevantes.

Se debe considerar en esta revisión el potencial sesgo de publicación, ya que *Grigsby*(60) hace referencia en su metaanálisis a un ensayo clínico completado en el año 2012 (con una muestra de 81 pacientes), cuyos resultados aún no han sido publicados.

**DE LA EVIDENCIA A LA RECOMENDACIÓN**

En base a la bibliografía revisada, la administración de glucosa en el suero de RIR no ha demostrado ser superior a los sueros isotónicos en las variables de eficacia analizadas, con excepción de la reducción de la cetonemia, cuya significación clínica más allá de las hipótesis fisiopatológicas no está bien establecida. Sin embargo, tal como apunta *Grigsby*(60)*,* debido a las limitaciones de la calidad de la evidencia revisada tampoco se puede descartar que la RIR con sueros isotónicos con glucosa pudiese aportar beneficios clínicos relevantes. En esta misma línea, *Niescierenko*(57) considera que, aunque los resultados del estudio de *Levy*(11) no hayan alcanzado significación estadística, la reducción del porcentaje de ingresos y la importante disminución de las reconsultas no programadas en los pacientes que reciben SGS5%, datos que concuerdan con *Sendarrubias*(5), podrían tener implicaciones clínicas y económicas (coste-eficacia) que deben ser tenidas en cuenta a la hora de establecer una recomendación. Los miembros de este GT comparten las reflexiones de estos autores.

A la hora de establecer una recomendación se consideró además la práctica clínica habitual en nuestro medio, más allá de la experiencia profesional de los miembros de este GT. Para ello se revisaron los resultados de una encuesta cuyo objetivo era conocer la difusión y la variabilidad de los protocolos de RIR en los SUP a nivel nacional, que se presentaron en la Reunión anual de la SEUP en 2014(61). De los 87 centros que participaron en la encuesta el 75,6% disponían de un protocolo de RIR. El 53% de los protocolos de RIR utilizaban sueros isotónicos con glucosa, siendo la glucosa 2,5% la concentración más utilizada (42%).

**RECOMENDACIÓN**

**¿*ES NECESARIO AÑADIR GLUCOSA AL SUERO DE REHIDRATACIÓN?***

*Se recomienda utilizar suero isotónico con glucosa 2.5% en pacientes con glucemia normal y cetosis (recomendación fuerte, evidencia moderada)*

*En pacientes con glucemia y cetonemia normales se sugiere la utilización de suero isotónico con glucosa 2.5% (recomendación débil, evidencia baja)*

*En pacientes con glucemia normal y cetonemia NO disponible se sugiere utilizar suero isotónico con glucosa 2.5% (recomendación débil, evidencia baja)*

*En pacientes con hiperglucemia (> 140mg/dl) se sugiere la utilización de suero isotónico SIN glucosa (recomendación fuerte, evidencia baja)*

## PREGUNTA 10: ¿ES SEGURA LA REHIDRATACIÓN INTRAVENOSA RÁPIDA?

**COMENTARIO DE LA EVIDENCIA**

Para responder a esta pregunta se centró la búsqueda bibliográfica específicamente en aquellas publicaciones que establecen como objetivo, principal o secundario, el análisis de variables relacionadas con la seguridad de la RIR. Atendiendo a este criterio se identificaron 1 RS(34)***,*** 1 metaanálisis(60) y 7 ECAs(4)(6)(7)(8)(9)(10)(14). No obstante, se revisaron además los estudios analizados en el resto de apartados de este documento.

En este apartado se ha revisado la evidencia disponible en relación a la mortalidad y los EA (graves /no-graves)(62), definidos en la metodología de este documento (anexo 2)***.*** Los desenlaces de interés y la calidad de la evidencia disponible para cada uno de ellos se resumen en la tabla 7. El análisis GRADE del nivel de calidad de evidencia asignado se detalla en el Anexo 9. Para evitar duplicidades, los desenlaces de interés de “Seguridad” relacionados con alteraciones electrolíticas y de la glucemia ya se han comentado con más detalle en las preguntas previas (ver tablas 4, 5, 6 y anexos 5, 6 y 7).

La RS de *Iro*(34) , establece como objetivo principal el análisis de la mortalidad y como objetivos secundarios la seguridad (EA graves y disnatremias) y la eficacia. Esta RS incluye 3 ECAs(1)(2)(3) que comparan pautas de rehidratación IV con sueros isotónicos administrados a distinto ritmo de infusión (pautas “ultrarrápidas” *vs* RIR “estándar”) en niños con DH moderada-grave secundaria a GEA, excluyendo estudios realizados en pacientes con malnutrición grave o diarrea crónica/prolongada. Los autores no reportan ningún fallecimiento ni tampoco ningún EA grave que hubiese sido definido como tal en su protocolo de estudio. Debido a la heterogeneidad de los trabajos incluidos no fue posible realizar un metaanálisis en las variables de seguridad. Revisando individualmente las publicaciones, solamente Freedman(3) reporta algunos EA “no-graves”: 2 extravasaciones de vía intravenosa (1 en cada grupo), 6 casos de edema periférico (4 en el grupo RIR “estándar” y 2 en el grupo “ultrarrápida”, *p* 0,44) y 2 casos de hiponatremia (1 en cada grupo). Parece relevante señalar que, en un análisis realizado sobre esta misma muestra y publicado posteriormente(14), los autores comentan que se registraron 9 casos de “posible” sobrecarga de volumen, pero ninguno de ellos fue considerado clínicamente relevante por el médico responsable. En el trabajo de *Nager*(1) se afirma que ningún paciente presentó EA relacionados con la fluidoterapia administrada ni complicaciones derivadas de alteraciones electrolíticas. *Azarfar*(2) comenta en la discusión que no se detectaron complicaciones significativas durante la investigación, pero no aportan datos de resultados en términos de seguridad.

En el metaanálisis de *Grigsby*(60) se definen los siguientes EA: hiperglucemia (glucemia >200mg/dl), hipoglucemia sintomática (glucemia <70mg/dl con cualquier síntoma), convulsiones, diagnóstico de sepsis en la semana posterior a la visita índice y mortalidad. No se reportan EA, aunque los autores comentan como limitación que estos no habían sido bien definidos en ninguno de los estudios incluidos. En la pregunta 9 de este documento se realiza un análisis más detallado del efecto de las distintas pautas de RIR sobre la glucemia.

De toda la bibliografía revisada, solamente se reportan casos de mortalidad en dos ECAs realizados en países en vías de desarrollo, con pacientes que presentaban DH grave secundaria a diarrea aguda. *Mahajan*(7) (India) registra un fallecimiento, pero aclara que la causa de la muerte fue un shock séptico y por tanto no parece relacionado con la intervención del estudio. En el trabajo de *Houston*(8)(Kenia y Uganda) se reportan 4 defunciones (2 en cada grupo), si bien los autores apuntan a que solamente uno de ellos (paciente del grupo “Plan C” que llega a urgencias con TEP de shock descompensado y, tras 2 expansiones de volumen, desarrolla signos de insuficiencia cardiaca falleciendo a las 13 horas del ingreso) sería atribuible a la intervención.

En relación a los EA graves, *Houston*(8) describe 5 casos que presentan complicaciones en las primeras 48 horas (3 pacientes [5%] en el grupo Plan C y 2 [3%] en el grupo “lento”), sin encontrar diferencias significativas entre ambos grupos (RR 0.67; IC95% 0,12–3,85; *p* 0,065). De los 5 pacientes con EA graves cuatro fallecieron. Los autores aportan un análisis detallado de estos casos y su evolución (tabla 7) concluyendo que solamente uno de los EA reportados es atribuible a la rehidratación. Se debe tener en consideración que las complicaciones graves descritas en el estudio de Houston podrían atribuirse al ámbito de estudio (Kenia y Uganda), así como al perfil de los sujetos incluidos (pacientes con DH grave y mayor complejidad, ya que no se consideran criterios de exclusión la inestabilidad hemodinámica y/o respiratoria a su llegada a urgencias, la comorbilidad aguda ni las alteraciones electrolíticas en la analítica basal).

El grupo de *Alam,* del Centro Internacional para la Investigación de las Enfermedades Diarreicas (Dhaka, Bangladesh), ha publicado dos ECAs(9)(10)**,** que analizan la seguridad y la eficacia de una estrategia RIR en niños con malnutrición grave y DH grave secundaria a diarrea aguda. En ambos estudios se considera criterio de exclusión la sospecha de patología aguda grave asociada (sepsis/shock séptico, meningitis, neumonía). En ninguno de ellos se reportan fallecimientos y ninguno de los pacientes incluidos desarrolla signos de insuficiencia cardiaca ni sobrecarga de volumen, que son monitorizados estrechamente.

En el resto de estudios revisados(4)(5)(6)(11)(12)no se reportan EA clínicamente relevantes, si bien es cierto que muchos trabajos no establecen a priori la definición y monitorización de los mismos.

En cuanto a los EA relacionados con parámetros analíticos, se revisan en este apartado las alteraciones del sodio, ya que fueron consideradas un desenlace crítico por este GT. Freedman(3) registra 2 hiponatremias (1 en cada grupo). Los autores publicaron posteriormente un análisis detallado de la evolución del sodio en esta misma muestra(14), concluyendo que la RIR, incluso en pautas “ultrarrápidas” con grandes volúmenes de suero isotónico (60ml/kg en 1 hora) es segura. Según sus resultados, el cambio en la concentración de sodio tras la RIR depende de la natremia basal; de tal forma que los niños con DH hiponatrémica tuvieron un incremento de sodio a las 4 horas de +2,6 mEq/L (DE 2,1), frente al +0,4 mEq/L (DE 2,1) de aquellos que no presentaban hiponatremia en la analítica inicial (*p* <0,001). Estos resultados concuerdan con los publicados posteriormente por *Sendarrubias*(5), que objetiva un incremento del sodio a las 2 horas de +3,00 mmol/L (IC95% +2,20 a +3,80) en los pacientes con sodio inicial <135 mmol/L, frente al +0,23 mmol/L (IC95% −0,17 a +0,63) en aquellos que partían de un sodio normal (135-145 mmol/L).

En el trabajo de *Houston*(8) aproximadamente la mitad (53%) de los pacientes tenía unos niveles de sodio fuera del rango normal a las 8 horas, sin diferencias entre grupos (58% en grupo “Plan C” *vs* 49% en grupo “lento”, *p* 0,32). A pesar de este dato, la mediana de la concentración de sodio a las 8 horas fue normal en ambos grupos (Plan C: 142 mmol/L [135-147]; Grupo “lento”: 142 mmol/L [138-148]). A la hora de interpretar estos resultados se debe tener en cuenta que el 60% de los sujetos incluidos en este estudio ya presentaban alteraciones del sodio en la analítica basal (Plan C: 58%; Grupo “lento”: 62%). Revisando los trabajos publicados por *Alam*(9)(10)***,*** que tampoco consideraban criterio de exclusión las alteraciones electrolíticas en la analítica basal, no se reportan trastornos electrolíticos graves ni alteraciones de la glucemia en ninguno de ellos.

**COMENTARIO DE LA EVIDENCIA A LA RECOMENDACIÓN**

A pesar de la heterogeneidad de las publicaciones revisadas en cuanto al perfil de la población de estudio, la intervención (composición del suero, ritmo de infusión y volumen total de rehidratación) y las variables resultado, se considera que existe evidencia suficiente para afirmar que las pautas de RIR constituyen una estrategia de rehidratación segura en pacientes con DH moderada-grave secundaria a GEA en nuestro medio, siempre que no exista contraindicación expresa o comorbilidad aguda grave.

***RECOMENDACIÓN***

***¿ES SEGURA LA REHIDRATACIÓN INTRAVENOSA RÁPIDA?***

La Rehidratación Intravenosa Rápida es SEGURA en pacientes con deshidratación secundaria a GEA, en los que la RHO esté contraindicada o haya fracasado, salvo que exista contraindicación expresa o comorbilidad aguda grave (*recomendación fuerte, evidencia alta*).

**BIBLIOGRAFÍA**

1. Nager AL, Wang VJ. Comparison of ultrarapid and rapid intravenous hydration in pediatric patients with dehydration. Am J Emerg Med. 2010; 28(2):123-9.
2. Azarfar A, Ravanshad Y, Keykhosravi A, Bagheri S, Gharashi Z, Esmaeeli M. Rapid intravenous rehydration to correct dehydration and resolve vomiting in children with acute gastroenteritis. Turkiye Acil Tip Derg. 2014; 14(3)111-4.
3. Freedman SB, Parkin PC, Willan AR, Schuh S. Rapid versus standard intravenous rehydration in paediatric gastroenteritis: Pragmatic blinded randomised clinical trial. BMJ. 2011; 343:d6976.
4. Allen CH, Goldman RD, Bhatt S, Simon HK, Gorelick MH, Spandorfer PR, et al. A randomized trial of Plasma-Lyte A and 0.9 % sodium chloride in acute pediatric gastroenteritis. BMC Pediatr. 2016; 16:117.
5. Sendarrubias M, Carrón M, Molina JC, Pérez MÁ, Maranõn R, Mora A. Clinical impact of rapid intravenous rehydration with dextrose serum in children with acute gastroenteritis. Pediatr Emerg Care. 2018; 31(12):832-836.
6. Kartha GB, Rameshkumar R, Mahadevan S. Randomized Double-blind Trial of Ringer Lactate Versus Normal Saline in Pediatric Acute Severe Diarrheal Dehydration. J Pediatr Gastroenterol Nutr. 2017; 65(6):621-626.
7. Mahajan V, Saini SS, Sharma A, Kaur J. Ringer’s lactate vs normal saline for children with acute diarrhea and severe dehydration: A double blind randomized controlled trial. Indian Pediatr. 2012; 49(12):963-8.
8. Houston KA, Gibb J, Olupot-Olupot P, Obonyo N, Mpoya A, Nakuya M, et al. Gastroenteritis aggressive versus slow treatment for rehydration (GASTRO): A phase II rehydration trial for severe dehydration: WHO plan C versus slow rehydration. BMC Med. 2019;17(1):122.
9. Alam NH, Islam S, Sattar S, Monira S, Desjeux JF. Safety of rapid intravenous rehydration and comparative efficacy of 3 oral rehydration solutions in the treatment of severely malnourished children with dehydrating cholera. J Pediatr Gastroenterol Nutr. 2009; 48(3):318-27.
10. Alam NH, Ashraf H, Ahmed T, Jahan N, Gyr N. Randomised trial showed that rapid rehydration of severely malnourished children with dehydrating diarrhoea was as safe and effective as slow rehydration. Acta Paediatr Int J Paediatr. 2020; 109(7):1473-1484.
11. Levy JA, Bachur RG, Monuteaux MC, Waltzman M. Intravenous dextrose for children with gastroenteritis and dehydration: A double-blind randomized controlled trial. Ann Emerg Med. 2013; 61(3):281-8.
12. Janet S, Molina JC, Marañón R, García-Ros M. Effects of Rapid Intravenous Rehydration in Children with Mild-to-Moderate Dehydration. Pediatr Emerg Care. 2015; 31(8):564-7.
13. Nager AL, Wang VJ. Comparison of nasogastric and intravenous methods of rehydration in pediatric patients with acute dehydration. Pediatrics. 2002; 109(4):562-72.
14. Freedman SB, Geary DF. Bolus fluid therapy and sodium homeostasis in paediatric gastroenteritis. J Paediatr Child Health. 2013; 49(3):215-22.
15. Phin SJ, McCaskill ME, Browne GJ, Lam LT. Clinical pathway using rapid rehydration for children with gastroenteritis. J Paediatr Child Health. 2003;39(5):343-8.
16. Steiner MJ, DeWalt DA, Byerley JS. Is this child dehydrated? Journal of the American Medical Association. 2004; 291(22): 2746-54.
17. Okposio MM, Onyiriuka AN, Abhulimhen-Iyoha BI. Point-of-admission serum electrolyte profile of children less than five years old with dehydration due to acute diarrhoea. Trop Med Health. 2015; 43(4):247-52.
18. Parkin PC, MacArthur C, Khambalia A, Goldman RD, Friedman JN. Clinical and laboratory assessment of dehydration severity in children with acute gastroenteritis. Clin Pediatr (Phila). 2010; 49(3):235-9.
19. Levy JA, Waltzman M, Monuteaux MC, Bachur RG. Value of point-of-care ketones in assessing dehydration and acidosis in children with gastroenteritis. Acad Emerg Med. 2013; 20(11):1146-50.
20. Freedman SB, Degroot JM, Parkin PC. Successful discharge of children with gastroenteritis requiring intravenous rehydration. J Emerg Med. 2014; 46(1):9-20.
21. Reid SR, Bonadio WA. Outpatient rapid intravenous rehydration to correct dehydration and resolve vomiting in children with acute gastroenteritis. Ann Emerg Med. 1996; 28(3):318-23.
22. Wathen JE, MacKenzie T, Bothner JP. Usefulness of the serum electrolyte panel in the management of pediatric dehydration treated with intravenously administered fluids. Pediatrics. 2004; 114(5):1227-34.
23. Levy JA, Bachur RG. Intravenous Dextrose during Outpatient Rehydration in Pediatric Gastroenteritis. Acad Emerg Med. 2007; 14(4):324-30.
24. Marín Del Barrio S, González Carretero P, Garrido Romero R, Juma Azara KM, Luaces Cubells C. Usefulness of acid-base and electrolyte balance in acute gastroenteritis. An Pediatr. 2008; 69(4):322-8.
25. Hayajneh WA, Jdaitawi H, Al Shurman A, Hayajneh YA. Comparison of clinical associations and laboratory abnormalities in children with moderate and severe dehydration. J Pediatr Gastroenterol Nutr. 2010; 50(3):290-4.
26. Guarino A, Ashkenazi S, Gendrel D, Lo Vecchio A, Shamir R, Szajewska H. European society for pediatric gastroenterology, hepatology, and nutrition/european society for pediatric infectious diseases evidence-based guidelines for the management of acute gastroenteritis in children in Europe: Update 2014. Journal of Pediatric Gastroenterology and Nutrition. 2014; 59(1):132-52.
27. Intravenous fluid therapy in children and young people in hospital. NICE National Institute for Health and Care Exellence. Quality Standard September 2016. Nice.org.uk/guidance/qs131.
28. Pruvost I, Dubos F, Chazard E, Hue V, Duhamel A, Martinot A. The Value of Body Weight Measurement to Assess Dehydration in Children. PLoS One. 2013; 8(1):e55063.
29. Friedman JN, Goldman RD, Srivastava R, Parkin PC. Development of a clinical dehydration scale for use in children between 1 and 36 months of age. J Pediatr. 2004;145(2):201-7.
30. Goldman RD, Friedman JN, Parkin PC. Validation of the clinical dehydration scale for children with acute gastroenteritis. Pediatrics. 2008;122(3):545-9.
31. Bailey B, Gravel J, Goldman RD, Friedman JN, Parkin PC. External validation of the clinical dehydration scale for children with acute gastroenteritis. Acad Emerg Med. 2010;
32. Bhan MK, Mahalanabis D, Pierce NF, Rollins N, Sack D SM. The Treatment of Diarrhoea: A Manual for Physicians and Other Senior Health Workers. 4th rev [Internet]. Available from: geneva: World Health Organization; 2005 [cited 2010 Sep 24]. Available from: whqlibdoc.who.int/ publications/2005/9241593180.pdf
33. Toaimah FHS, Mohammad HF. Rapid intravenous rehydration therapy in children with acute gastroenteritis : A systematic review. Pediatric Emergency Care. 2016; 32(2):131-5.
34. Iro MA, Sell T, Brown N, Maitland K. Rapid intravenous rehydration of children with acute gastroenteritis and dehydration: A systematic review and meta-analysis. BMC Pediatr. 2018; 18(1):44.
35. Emergency Department Rapid Intravenous Rehydration (RIVR) for Pediatric Gastroenteritis. No. <https://clinicaltrials.gov/ct2/show/NCT00392145>.
36. Colletti JE, Brown KM, Sharieff GQ, Barata IA, Ishimine P. The Management of Children with Gastroenteritis and Dehydration in the Emergency Department. J Emerg Med. 2010; 38(5):686-98.
37. Grisaru S, Xie J, Samuel S, Freedman SB. Iatrogenic Dysnatremias in Children with Acute Gastroenteritis in High-Income Countries: A Systematic Review. Front Pediatr. 2017; 5:210.
38. Bruzzese E, Lo Vecchio A, Guarino A. Hospital management of children with acute gastroenteritis. Current Opinion in Gastroenterology. 2013; 29(1):23-30.
39. Edelson JB, Orenstein EW, Zaoutis LB, Copelovitch L. Intravenous Fluid Management in the Pediatric Hospital Setting: Is Isotonic Fluid the Right Approach for all Patients? Curr Treat Options Pediatr. 2015; 1:90-99.
40. Santillanes G, Rose E. Evaluation and Management of Dehydration in Children. Emergency Medicine Clinics of North America. 2018; 36(2):259-273.
41. Hasman H, Cinar O, Uzun A, Cevik E, Jay L, Comert B. A randomized clinical trial comparing the effect of rapidly infused crystalloids on acid-base status in dehydrated patients in the emergency department. Int J Med Sci. 2012; 9(1):59-64.
42. Jucá CA, Rey LC, Martins CV. Comparison between normal saline and a polyelectrolyte solution for fluid resuscitation in severely dehydrated infants with acute diarrhoea. Ann Trop Paediatr. 2005; 25(4):253-60.
43. Hanna M, Saberi MS. Incidence of hyponatremia in children with gastroenteritis treated with hypotonic intravenous fluids. Pediatr Nephrol. 2010; 25(8):1471-5.
44. Green J, Lillie J. Intravenous fluid therapy in children and young people in hospital N29. Archives of Disease in Childhood: Education and Practice Edition. 2017; 102(6):327-331.
45. National Collaborating Centre for Women’s and Children’s Health. Diarrhoea and Vomiting Caused by Gastroenteritis: Diagnosis, Assessment and Management in Children Younger than 5 Years. 2009. National Institute for Health and Clinical Excellence:Guidance.
46. Acute gastroenteritis guidelines Team, Cincinnati Children´s Hospital Mecical acute gastroenteritis in children aged 2 months to 18 years [Internet]. Available from: http//www.cincinnatichildren.org/service/j/Anderson-center/evidence-based-care/gastroenteritis.
47. Hartman S, Brown E, Loomis E, Russell HA. Gastroenteritis in children. Am Fam Physician. 2019; 99(3):159-165.
48. Feld LG, Neuspiel DR, Foster BA, Leu MG, Garber MD, Austin K, et al. Clinical Practice Guideline: Maintenance Intravenous Fluids in Children. Pediatrics. 2018; 142(6):e20183083.
49. Young JB, Utter GH, Schermer CR, Galante JM, Phan HH, Yang Y, et al. Saline versus plasma-lyte A in initial resuscitation of trauma patients: A randomized trial. Ann Surg. 2014; 259(2):255-62.
50. Chowdhury AH, Cox EF, Francis ST, Lobo DN. A randomized, controlled, double-blind crossover study on the effects of 2-L infusions of 0.9% saline and plasma-lyte® 148 on renal blood flow velocity and renal cortical tissue perfusion in healthy volunteers. Ann Surg. 2012; 256(1):18-24.
51. Blumberg N, Cholette JM, Pietropaoli AP, Phipps R, Spinelli SL, Eaton MP, et al. 0.9% NaCl (Normal Saline) – Perhaps not so normal after all? Transfusion and Apheresis Science. 2018; 57(1):127-131.
52. El Gkotmi N, Kosmeri C, Filippatos TD, Elisaf MS. Use of intravenous fluids/solutions: a narrative review. Current Medical Research and Opinion. 2017; 33(3):459-471.
53. Robroch AH, Van Heerde M, Markhorst DG. Should isotonic infusion solutions routinely be used in hospitalised paediatric patients? Archives of Disease in Childhood. 2011; 96(6): 608-10.
54. Neville KA, Sandeman DJ, Rubinstein A, Henry GM, McGlynn M, Walker JL. Prevention of Hyponatremia during Maintenance Intravenous Fluid Administration: A Prospective Randomized Study of Fluid Type versus Fluid Rate. J Pediatr. 2010; 156(2):313-9.
55. Langer T, Santini A, Scotti E, Van Regenmortel N, Malbrain MLNG, Caironi P. Intravenous balanced solutions: from physiology to clinical evidence. Anestezjol Intens Ter. 2015; 47 Spec No:s78-88.
56. Young P, Bailey M, Beasley R, Henderson S, Mackle D, McArthur C, et al. Effect of a buffered crystalloid solution vs saline on acute kidney injury among patients in the intensive care unit: The SPLIT randomized clinical trial. JAMA - J Am Med Assoc. 2015; 314(16):1701-10.
57. Niescierenko M, Bachur R. Advances in pediatric dehydration therapy. Current Opinion in Pediatrics. 2013; 25(3):304-9
58. Canziani BC, Uestuener P, Fossali EF, Lava SAG, Bianchetti MG, Agostoni C, et al. Clinical Practice: Nausea and vomiting in acute gastroenteritis: physiopathology and management. European Journal of Pediatrics. 2018; 177(1):1-5.
59. Reid SR, Losek JD. Rehydration: Role for early use of intravenous dextrose. Pediatric Emergency Care. 2009;25(1):49-52.
60. Grigsby A, Herron J, Hunter BR. Does the addition of dextrose to IV crystalloid therapy provide clinical benefit in acute dehydration? A systematic review and meta-analysis. Can J Emerg Med. 2019; 21(5):638-645.
61. Guerra L, Slöcker M, Míguez C, Mora A. “Pautas de rehidratación intravenosa rápida: encuesta nacional”. XIX Reunión anual SEUP 2014. Disponible en: <https://seup.org/pdf_public/reuniones/2014/c_orales2B.pdf> (página 22)
62. International Conference on Harmonisation of Technical Requirements for Registration of Pharmaceuticals for Human Use. Harmonised Tripartite Guideline: Clinical Safety Data Management: Definitions and Standards for Expedited Reporting E2a. Effic Guidel. 1994.

**ABREVIATURAS**

SEUP: Sociedad Española de Urgencias Pediátricas

RIR: Rehidratación intravenosa rápida

GEA: Gastroenteritis aguda

DH: Deshidratación

RIV: Rehidratación intravenosa

GT: Grupo de trabajo

GPC: Guías de práctica clínica

RS: Revisiones sistemáticas

ECA: Ensayos clínicos aleatorizados

SS0.9%: Suero salino fisiológico

RL: Ringer Lactato

UP: Urgencias Pediátricas

HOS: Hospitalario

RHO: Rehidratación oral

EA: Efectos adversos

SNC: Sistema nervioso central

IV: Intravenoso

ITU: Infección del tracto urinario

PLA: Plasmalyte-A

DE: Desviación estándar

SNG: Sonda nasogástrica

Na: Sodio

K: Potasio

HCO3: Bicarbonato

RIC: Rango intercuartílico

SGS5%: Suero isotónico con glucosa 5%

SGS2.5%: Suero isotónico con glucosa 2.5%
