# Supplementary material
Source: Elsevier journal article supplement (https://www.sciencedirect.com/science/article/pii/S1695403321001909)
Supplement: mmc6 [file S1695403321001909:mmc6.docx]

**Anexo 6. ¿A QUÉ RITMO DE INFUSIÓN SE DEBE ADMINISTRAR LA RIR? ¿CUÁNDO SE DEBE FINALIZAR LA RIR? ANÁLISIS GRADE DE LA CALIDAD DE LA EVIDENCIA**

|  |  | | | | | | | **Calidad de la evidencia** | **Importancia** |
| --- | --- | --- | --- | --- | --- | --- | --- | --- | --- |
| **№ de estudios** | **Diseño de estudio** | **Riesgo de sesgo** | **Inconsistencia** | **Evidencia indirecta** | **Imprecisión** | **Otras consideraciones** |
| Ingreso | 3 | 1 RS (Iro 2018)  2 ECA (Nager 2010, Freedman 2011) | No serio | Serioa | No serio | No serio |  | Moderada | Relevante |
| Reconsultas | 4 | 1 RS (Iro 2018)  3 ECAs (Nager 2010, Freedman 2011, Houston 2019) | No serio | No serio | Seriob | No serio |  | Moderada | Relevante |
| Éxito de la rehidratación | 4 | 4 ECAs (Nager 2010, Freedman 2011, Azarfar 2014, Houston 2019) | No serio | No serio | Seriob | No serio |  | Moderada | Clave |
| Recuperación de la tolerancia oral | 2 | ECA (Freedman 2011, Houston 2019) | No serio | No serio | Seriob | No serio |  | Moderada | Clave |
| Tiempo de estancia en urgencias | 2 | ECA (Freedman 2011, Houston 2019) | No serio | Serioc | Seriob | No serio |  | Baja | Relevante |
| Cambios en HCO3 | 1 | ECA (Freedman, 2011) | No serio | No serio | No serio | Seriod | Variable no analizada en otros estudios | Baja | Relevante |
| pH | 1 | ECA (Freedman, 2011) | No serio | No serio | No serio | Seriod | Variable no analizada en otros estudios | Baja | Relevante |
| Cambios en Na | 3 | ECA ( Nager 2010, Freedman 2011, Houston 2019) | No serio | No serio | Seriob | No serio |  | Moderada | Clave |
| Cambios en K | 2 | ECA (Nager 2010, Freedman 2011) | No serio | Serioe | No serio | No serio |  | Moderada | Relevante |
| Glucosa | 2 | ECA (Nager 2010, Freedman 2011) | No serio | No serio | No serio | No serio |  | Alta | Clave |

#### RS: Revisión sistemática. ECA: Ensayo clínico aleatorizado.HCO3: Bicarbonato. Na: Sodio. K: Potasio

#### Comentarios

#### Según el metaanálisis de Iro y el estudio de Nager no hay diferencias significativas entre grupos. Sin embargo, Freedman reporta mayor proporción de ingresos en los pacientes que reciben la pauta ultrarrápida.

1. La población de estudio, las intervenciones realizadas y las variables resultado que definen el desenlace ce interés en cada estudio son heterogéneas, fundamentalmente a expensas del estudio de Houston.
2. En relación a este desenlace de interés los resultados de los estudios son contradictorios.
3. Muestra pacientes pequeña.
4. Resultados contradictorios entre autores. Freedman halla diferencias estadísticamente significativas en los valores medios de K a las 4 horas, sin embargo éstas son clínicamente irrelevantes.
