# Supplementary material
Source: Elsevier journal article supplement (https://www.sciencedirect.com/science/article/pii/S1695403321001909)
Supplement: mmc7 [file S1695403321001909:mmc7.doc]

**Anexo 7. ¿QUÉ TIPO DE SUERO SE DEBE UTILIZAR PARA REALIZAR LA RIR? ANÁLISIS GRADE DE LA CALIDAD DE LA EVIDENCIA**

|  |  | | | | | | | **Calidad de la evidencia** | **Importancia** |
| --- | --- | --- | --- | --- | --- | --- | --- | --- | --- |
| **№ de estudios** | **Diseño de estudio** | **Riesgo de sesgo** | **Inconsistencia** | **Evidencia indirecta** | **Imprecisión** | **Otras consideraciones** |
| Alteraciones del Sodio | 3 | 3 ECAs (Mahajan 2012, Allen 2016, Kartha 2017) | No serio | No serio | Serioa | No serio |  | Moderada | Clave |
| Alteraciones del Potasio | 3 | 3 ECAs (Mahajan 2012, Allen 2016, Kartha 2017) | No serio | Seriob | Serioa | No serio |  | Baja | Relevante |
| Alteraciones del Cloro | 3 | 3 ECAs (Mahajan 2012, Allen 2016, Kartha 2017) | No serio | No serioc | Serioa | No serio |  | Moderado | Relevante |
| Corrección de pH | 2 | 2 ECAs (Mahajan 2012, kartha 2017) | No serio | No serio | No serio | Seriod |  | Moderada | Relevante |
| Cambios en HCO3 | 3 | 3 ECAs (Mahajan 2012, Allen 2016, Kartha 2017) | No serio | Serioe | No serio | No serio |  | Moderada | Relevante |
| Éxito en la rehidratación | 3 | 3 ECAs (Mahajan 2012, Allen 2016, Kartha 2017) | No serio | No serio | Serioa | No serio |  | Moderada | Clave |
| Proporción ingresos | 1 | 1 ECA (Allen et al, 2016) | Seriof | No serio | No serio | Seriog |  | Baja | Relevante |
| Estancia hospitalaria/tiempo rehidratación | 2 | 2 ECAs (Mahajan 2012, kartha 2017) | No serio | No serioh | Serioa | Seriod |  | Baja | Relevante |

ECA: Ensayo clínico aleatorizado.HCO3: Bicarbonato.

Comentarios

1. Heterogeneidad de los estudios en cuanto a las intervenciones y la forma y el momento de medir las variables resultado.
2. Mientras que en el estudio de Mahajan hallan diferencias en los niveles finales de K tras la rehidratación (niveles más bajos en pacientes que recibieron SS 0,9%), no ocurre así en el caso de Kartha que no encuentra diferencias.
3. El estudio de Allen concluye que el cloro a las 4 horas es mayor en pacientes tratados con SS 0,9%(suero salino fisiológico). Kartha y Mahajan, no encuentran diferencias. La discrepancia en estos resultados podría ser atribuidas a que la diferente concentración de cloro en los sueros utilizados (Allen: Plasmalyte 98 mEq/L; Kartha y Mahajan: Ringer Lactato 109 mEq /L).
4. En ambos estudios el tamaño muestral es pequeño.
5. Los estudios de Mahajan y Kartha comparando ambos SS 0,9% frente a RL con volúmenes similares llegan a resultados diferentes.
6. En la metodología del estudio no están recogidos los motivos de ingreso y por lo tanto resulta difícil interpretar los resultados.
7. Este desenlace de interés sólo se reporta en el estudio de Allen y su muestra es pequeña.
8. Diferentes resultados entre los estudios, que no parecen justificados por el perfil de los pacientes incluido ni por diferencias en la intervención pero sí podrían atribuirse a la forma en la que cada autor mide la variable resultado (Mahajan en horas y Kartha en días).
