# Supplementary material
Source: Elsevier journal article supplement (https://www.sciencedirect.com/science/article/pii/S1695403321001909)
Supplement: mmc9 [file S1695403321001909:mmc9.doc]

**Anexo 9: ¿SON SEGURAS LAS PAUTAS DE RIR? ANÁLISIS GRADE DE LA CALIDAD DE LA EVIDENCIA**

|  |  | | | | | | | **Calidad de la evidencia** | **Importancia** |
| --- | --- | --- | --- | --- | --- | --- | --- | --- | --- |
| **№ de estudios** | **Diseño de estudio** | **Riesgo de sesgo** | **Inconsistencia** | **Evidencia indirecta** | **Imprecisión** | **Otras consideraciones** |
| Mortalidad | 9 | 1 metaanálisis (Grigsby 2019 Levy 2013, Sendarrubias 2017)  1 RS (Iro 2018 Nager 2010, Freedman 2011, Azarfar 2014)  7 ECAs (Allam 2009, Mahajan 2012, Freedman 2013, Allen 2016, Kartha 2017 Houston 2019, Alam 2019) | No serio | No serio | No serio | No serio |  | Alta | Clave |
| Eventos Adversos Graves | 9 | 1 metaanálisis (Grigsby 2019 Levy 2013, Sendarrubias 2017)  1 RS (Iro 2018 Nager 2010, Freedman 2011, Azarfar 2014)  7 ECAs (Allam 2009, Mahajan 2012, Freedman 2013, Allen 2016, Kartha 2017 Houston 2019, Alam 2019) | No serio | No serio | No serio | No serio |  | Alta | Clave |
| Eventos Adversos No Graves | 9 | 1 metaanálisis (Grigsby 2019 Levy 2013, Sendarrubias 2017)  1 RS (Iro 2018 Nager 2010, Freedman 2011, Azarfar 2014)  ECAs (Allam 2009, Mahajan 2012, Freedman 2013, Allen 2016, Kartha 2017 Houston 2019, Alam 2019) | Serioa | No serio | Seriob | No serio | Es probable que exista una infranotificación de EA no graves que no hayan sido definidos en la metodología de los estudios | Muy baja | Relevante |

RS: Revisiones sistemáticas. ECA: Ensayo clínico aleatorizado

**Comentarios**

1. La mayoría de los estudios no están diseñados para evaluar efectos adversos no graves y estos no están bien definidos en el protocolo del estudio.
2. Mucha heterogeneidad en cuanto al perfil del paciente incluido y las intervenciones.
